1 **Non-invasive human skin transcriptome analysis using mRNA in skin**

2 **surface lipids**

3

4 Takayoshi Inoue\*, Tetsuya Kuwano, Yuya Uehara, Michiko Yano, Naoki Oya, Akira

5 Hachiya, Yoshito Takahashi, Noriyasu Ota, Takatoshi Murase\*

6

7 Biological Science Research, Kao Corporation, Tochigi, Japan

8 2606, Akabane, Ichikai-machi, Haga-gun, Tochigi, 321-3497, Japan

9

10 **\*Corresponding authors**

11 Takayoshi Inoue, PhD; E-mail: [inoue.takayoshi@kao.com](mailto:inoue.takayoshi@kao.com)

12 ORCID ID: 0000-0003-1038-4127

13 Takatoshi Murase, PhD; E-mail: [murase.takatoshi@kao.com](mailto:murase.takatoshi@kao.com)

14 ORCID ID: 0000-0002-5496-0133

15

16

17 **Abstract**

18 Non-invasive acquisition of mRNA data from the skin would be extremely useful for  
19 understanding skin physiology and diseases. Inspired by the holocrine process, in which the  
20 sebaceous glands secrete cell contents into the sebum, we focused on the possible presence of  
21 mRNAs in skin surface lipids (SSLs). We found that measurable human mRNAs exist in SSLs,  
22 where sebum protects them from degradation by RNases. The AmpliSeq transcriptome analysis  
23 was modified to measure SSL-RNAs, and our results revealed that SSL-RNAs predominantly  
24 contained mRNAs derived from sebaceous glands, epidermis, and hair follicles. Analysis of  
25 SSL-RNAs non-invasively collected from patients with atopic dermatitis revealed significantly  
26 increased expression of inflammation-related genes and decreased expression of terminal  
27 differentiation-related genes, consistent with the results of previous reports. Further, we found  
28 that lipid synthesis-related genes were downregulated in the sebaceous glands of patients with  
29 atopic dermatitis. These results indicate that the analysis of SSL-RNAs is promising to  
30 understand the pathophysiology of skin diseases.

31 \_\_\_\_\_

32 **Introduction**

33 Intra- and inter-organ communication mediated via various hormones, growth factors,  
34 cytokines, metabolites, and miRNAs play important roles in maintaining homeostasis in the  
35 human body (1). Several efforts have been made to establish comprehensive analytical methods  
36 for these mediators to monitor the physiological conditions of the body and explore predictive  
37 biomarkers for various diseases (2–5). Especially, the use of serum, urine, and saliva samples,  
38 which can be obtained in a non- or low-invasive manner, has been widely investigated.

39 The skin is often referred to as “the window to body’s health” since the skin phenotypes, such  
40 as the cutaneous pathology, appearance, and its secretions reflect not only the skin condition but  
41 also the condition inside the body (6). Moreover, the skin forms the body surface and  
42 biomolecules can be easily collected from the sweat, hair, and stratum corneum samples, and  
43 thus, skin is a useful source of samples to monitor the skin and body conditions. For instance,  
44 the cortisol content in the scalp hair correlates with long-term cumulative cortisol exposure (7).  
45 The sweat can also be used as an indicator of internal physiological changes (8), and attempts  
46 have been made to monitor patients’ conditions, for instance, tracking blood glucose levels by  
47 measuring glucose in sweat samples of patients with diabetes (9). Although metabolites,  
48 proteins, and DNA are relatively easy to collect from the sweat and hair samples (10, 11), it is  
49 difficult to collect measurable mRNAs from skin in a non- or low-invasive manner. So far, tape-

50 stripped stratum corneum has been used to collect mRNAs in a minimally invasive manner (12),  
51 however, the mRNA content is very low and highly degraded due to the RNase activity on the  
52 skin surface. Therefore, a skin biopsy is practically required to analyze mRNA expression;  
53 however, this method is invasive, which limits its application. More recently, a minimally  
54 invasive method for mRNA analysis via RNA-seq using AmpliSeq technology with 16–20  
55 consecutive tape strips was reported (13–15). However, tape stripping of the stratum corneum is  
56 known to induce skin damage, including disruption of the skin barrier (16), epidermal  
57 hyperproliferation, and infiltration of CD3-positive T cells into the dermis (17), indicating that  
58 the problems related to the invasiveness of this technique remain to be fully resolved.

59 The sebaceous glands synthesize and accumulate lipids to produce sebum. The lipids  
60 accumulated in the cytosol of sebocytes are secreted into the sebaceous ducts following rupture  
61 of the plasma membrane; this mode of secretion is called holocrine secretion (18) and is unique  
62 among the exocrine glands such as lipid-secreting sebaceous and meibomian glands. The  
63 holocrine secretion of the cell contents led us to the idea that sebum may contain various  
64 biomolecules, including mRNAs, which may be useful for analyzing biological information.  
65 Therefore, in this study, we first investigated the presence of mRNAs in human sebum and  
66 established a non-invasive, comprehensive method of analyzing human mRNAs using skin  
67 surface lipids (SSLs) as samples. Further, the applicability of this method in skin

68 characterization was verified in healthy subjects and patients with atopic dermatitis (AD).

69 \_\_\_\_\_

70 **Methods**

71 **Subject recruitment and collection of SSLs**

72 Thirty-two healthy male individuals (mean age: 34.6 years, range: 20–49 years, SD = 9.24)

73 were recruited for the study that was conducted in October 2016. The individuals were

74 evaluated by dermatologists prior to the commencement of the study to confirm no obvious skin

75 disease or condition on their faces. Thirty male patients (mean age: 31.0 years, range: 20–48

76 years, SD = 8.82) diagnosed with mild or moderate facial AD were recruited during June–

77 October 2017. All subjects were required not to remove facial sebum by washing or using wipes

78 or shaving their face on the test day until the end of the test. Patients with AD were also

79 restricted to use steroidal anti-inflammatory and immunosuppressive drugs on the facial skin 24

80 h prior to the study. The study was approved by the Human Research Ethics Committee, Kao

81 Corporation (approval numbers: 792-2016082 and T003-170413), Japan Aesthetic Dermatology

82 Symposium (approval number: KU-2017-05-003), and the Shinjukuminamiguchi Dermatologic

83 Clinic (approval number: KU-2016-10-005).

84 SSLs were collected by wiping the whole face (forehead, cheek, face line, nose, and chin)

85 using an oil blotting film (8.0 cm x 5.0 cm, 3M Japan, Tokyo, Japan) and samples were stored in

86 glass vials at -80 °C until use.

87

88 **Skin tissue**

89 Surgically removed adult forehead skin from three Caucasian males, aged 62, 66, and 67  
90 years, and nose skin from one adult (Caucasian female, 66-years-old) were provided by the  
91 Colorado Dermatology Institute (Colorado Springs, CO, USA) for laser microdissection and  
92 immunostaining, respectively. The procurement of skin tissues was approved by the Institutional  
93 Review Board of IntegReview Ltd. (Austin, TX, USA; approval number: T046a-170829) and  
94 was conducted according to the Declaration of Helsinki Principles. Informed consents were  
95 obtained from the volunteers prior to surgery. After surgery, the skin tissues were stored in  
96 William's E medium (Life Technologies, Carlsbad, CA, USA) at 4 °C until embedding. All skin  
97 tissues were embedded using the Tissue-Tek optimal cutting temperature compound (Sakura  
98 Finetek, Tokyo, Japan) and kept frozen until sectioning.

99

100 **mRNA extraction and qPCR**

101 Human saliva, sweat, urine, and serum samples collected from two donors were purchased  
102 from Cosmo Bio (Tokyo, Japan). Total RNA was extracted from 1 mL of each sample using the  
103 TRIzol LS reagent (Thermo Fisher Scientific, Waltham, MA, USA). Total RNA was extracted  
104 from the stratum corneum of the cheek of two healthy males according to a previous report (12).  
105 Collected RNA was dissolved with 10 µL of nuclease-free water. RNAs in SSLs (SSL-RNAs)

106 was extracted using the TRIzol reagent (Thermo Fisher Scientific) as follows: 2.85 mL of  
107 TRIzol was added to a finely cut oil blotting film containing sebum samples. Next, the solution  
108 was divided equally into two tubes and 260  $\mu$ L of chloroform was added to each tube and mixed  
109 by vortexing. The tubes were centrifuged at  $12,000 \times g$  for 15 min at 4 °C. The upper layer was  
110 transferred to a fresh tube and precipitated with ethanol. The precipitates were washed with  
111 70 % ethanol (v/v) and dissolved in 10  $\mu$ L of nuclease-free water.

112 Reverse transcription was performed using the SuperScript IV First-Strand Synthesis  
113 System and Oligo-dT primers (Thermo Fisher Scientific). The qPCR was performed using the  
114 TaqMan Fast Universal PCR Master Mix (Thermo Fisher Scientific) and TaqMan probes for  
115 each gene (Thermo Fisher Scientific).

116

#### 117 **Evaluation of mRNA degradation in SSLs**

118 To prepare standard samples with different levels of degraded mRNAs, total RNA (1  $\mu$ g)  
119 extracted from normal human epidermal keratinocytes (NHEK) (Cascade Biologics, Portland,  
120 OR, USA) was incubated with 30–1000 ng/mL of recombinant human RNase 7 (Novus  
121 Biologicals, Littleton, CO, USA) in 10 mM Tris-HCl buffer (pH 8.0) (Nippon Gene, Tokyo,  
122 Japan) for 30 min. QIAzol lysis reagent (Qiagen, Hilden, Germany) and chloroform were added  
123 to the samples treated with RNase 7 or SSLs collected from six healthy males as described



124 above. After the solutions were vortexed and centrifuged, RNA in the supernatant was purified  
125 using the miRNeasy Mini Kit (Qiagen). The level of RNA degradation in the samples was  
126 determined using the High Sensitivity RNA ScreenTape (Agilent Technologies, Palo Alto, CA,  
127 USA) on an Agilent 4200 TapeStation system (Agilent Technologies). The level of degradation  
128 of human mRNAs in SSLs was estimated using the following calculated DV200 value, which  
129 evaluates the percentage of fragments containing > 200 nucleotides. mRNA was reverse-  
130 transcribed using the SuperScript IV First-Strand Synthesis System and Oligo-dT primers  
131 (Thermo Fisher Scientific) and was amplified in a thermal cycler using the PowerUP SYBR  
132 Green Master Mix (Thermo Fisher Scientific) and the following primers:  
133 *ACTB* (forward primer 57 bp): 5'-GCTTTTGGTCTCCCTGGGAG-3'  
134 *ACTB* (forward primer 363 bp): 5'-ACAATGTGGCCGAGGACTTT-3'  
135 *ACTB* (reverse primer): 5'-AGTCAGTGTACAGGTAAGCCC-3'

136 Abundance of each amplicon was determined from the RNA standard curve. Further,  
137 DV200 values of the SSL-RNA samples were calculated from the standard curve of DV200  
138 plotted against abundance ratio of the amplicons (363 bp/57 bp).

139

#### 140 **Immunostaining**

141 Skin sections obtained from the nose of a Caucasian female were fixed in acetone at -20 °C

142 for 10 min and treated with 0.1 % Triton X-100/PBS for 5 min. The skin sections were  
143 incubated with Protein Block serum-free (Agilent Technologies) for 30 min, then with the  
144 primary antibodies against keratin/cytokeratin (mouse mono-clonal (AE-1/AE-3), original  
145 solution, Nichirei, Tokyo, Japan) or RNase 7 (rabbit poly-clonal, 1:50, Cloud-Clone Corp.,  
146 Houston, TX, USA) for 1 h at 20–25 °C, and finally with anti-rabbit IgG (donkey poly-clonal,  
147 Alexa Fluor 555, 1:1000, Thermo Fisher Scientific) or anti-mouse IgG (goat poly-clonal, Alexa  
148 Fluor 647, 1:1000, Thermo Fisher Scientific) for 30 min. Samples were mounted on a glass slide  
149 and imaged using fluorescence microscopy (BZ-X710, Keyence, Osaka, Japan).

150

## 151 **Western blotting**

152 Total protein was extracted from SSLs using 350  $\mu$ L of RIPA buffer and was purified using  
153 the Ready Prep 2-D cleanup kit (Bio-Rad, Hercules, CA, USA); the protein concentration was  
154 measured using the BCA protein assay kit (Thermo Fisher Scientific). Afterwards, 70  $\mu$ L of  
155 trichloroacetic acid was added and the samples were incubated on ice for 30 min, followed by  
156 centrifugation at 13,000  $\times$  g for 5 min at 4 °C. Chilled acetone (500  $\mu$ L) was added to the  
157 pellets, the tubes were centrifuged at 13,000  $\times$  g for 5 min at 4 °C, and the supernatant was  
158 removed. The pellets were dissolved in SDS sample buffer (Novagen, Darmstadt, Germany) and  
159 boiled at 95 °C for 5 min. Proteins (5  $\mu$ g) were separated on a 4–15 % polyacrylamide gradient

160 gel (Bio-Rad) and then transferred to a polyvinylidene fluoride (PVDF) membrane (Bio-Rad)  
161 soaked in Tris-Glycine Buffer (25 mM Tris, 192 mM glycine; pH 8.2) containing 20 % (v/v)  
162 methanol. The PVDF membrane blocked with PVDF Blocking Reagent for Can Get Signal  
163 (Toyobo, Tokyo, Japan) was incubated with anti-RNase 7 antibody (rabbit polyclonal, 1:200,  
164 Cloud-Clone Corp, Katy, TX, USA) for 60 min followed by incubation with anti-rabbit IgG,  
165 horseradish peroxidase-linked secondary antibody (donkey monoclonal, 1:2000, GE Healthcare,  
166 Bucks, UK) for 45 min. The bands were visualized using ECL prime western blotting detection  
167 reagents (GE Healthcare).

168

#### 169 **Effect of sebum lipids on RNase activity**

170 The oil blotting film used to collect SSLs from the face was finely cut and 1 mL distilled  
171 water and 4 mL tert-butyl methyl ether were added to the cut film. The solution was transferred  
172 to a new glass vial, and centrifuged at  $2,050 \times g$  at 4 °C for 10 min. The upper layer was  
173 transferred to a new glass vial, and the organic solvent was dried by blowing nitrogen over it.  
174 The remaining sebum lipids were dissolved in 100  $\mu$ L dimethyl sulfoxide (DMSO) and used for  
175 analysis.

176 Cholesterol ester (cholesteryl palmitate, Sigma-Aldrich, St. Louis, MO, USA, C6072), wax  
177 ester (lauryl palmitoleate, Santa Cruz Biotechnology, Santa Cruz, CA, USA, sc-280908),

178 triacylglycerol (glyceryl trioleate, Sigma-Aldrich, T7140), free fatty acid (palmitoleic acid,  
179 Sigma-Aldrich, P9417), squalene (Sigma-Aldrich, S3626), and cholesterol (Sigma-Aldrich,  
180 C8667) were used as authentic samples to identify the lipid molecular species. The sebum lipids  
181 extracted from the oil blotting films were dissolved in chloroform/methanol (2:1, v/v). The  
182 authentic lipids and 5 mg sebum lipid samples were separated on a thin-layer chromatography  
183 (TLC) plate using hexane: diethyl ether: acetic acid (70:30:1, v/v/v). After chromatography, the  
184 plate was divided using a glass cutter into portions containing the authentic lipids and sebum  
185 lipid samples, and the portion containing the authentic lipids was sprayed with a solution  
186 containing 10 % (w/v) copper sulfate and 8 % (w/v) phosphoric acid, and then heated at 180 °C  
187 for 3 min to visualize the location of each lipid. Based on the mobility of the authentic lipids,  
188 the silica corresponding to portions of sebum lipids was scraped off. The silica was sonicated in  
189 the chloroform/methanol (2:1, v/v) mixture to extract the lipids and centrifuged at  $2,050 \times g$  for  
190 5 min. The supernatant was dried and dissolved in 15  $\mu$ L DMSO; the solution was further  
191 diluted 3- and 9-fold using DMSO.

192 Cholesterol ester (cholesteryl palmitoleate, Olbracht Serdary Research Laboratories,  
193 Toronto, Canada, D-161), wax ester (behenyl palmitoleate, Nu Chek Prep, Elysian, MN, USA,  
194 WE-1368), triacylglycerol (glyceryl tripalmitoleate, Sigma-Aldrich, T5888; glyceryl trioleate,  
195 Sigma-Aldrich, T7140), free fatty acids (myristoleic acid, Sigma-Aldrich, M3525; palmitoleic

196 acid, Sigma-Aldrich, P9417; oleic acid, Sigma-Aldrich, O1008), squalene (Sigma-Aldrich,  
197 S3626), and cholesterol (Sigma-Aldrich, C8667) were used to determine the active ingredients  
198 in the sebum. NHEK RNA (20 µg/mL final concentration) was mixed with RNase 7 (final  
199 concentration: 1 µg/mL) in 10 mM Tris-HCl buffer (pH 8.0) with or without sebum or the lipid  
200 reagent (total 50 µL), and sonicated, followed by incubation at 20–25 °C for 30 min.

201 Subsequently, RNA was extracted using TRIzol LS reagent and the quality of the RNA was  
202 determined using the High Sensitivity RNA ScreenTape on Agilent 4200 TapeStation System.

203

#### 204 **Library preparation for Ion AmpliSeq**

205 Following the addition of 2.85 mL of QIAzol reagent (Qiagen) to a finely cut oil blotting  
206 film containing sebum samples, QIAzol solution was divided equally into two tubes.  
207 Chloroform (260 µL) was added to each tube and vortexed, and the tubes were centrifuged at  
208 12,000 × g for 15 min at 4 °C. The upper layer was transferred to a fresh tube. RNA was purified  
209 using the RNeasy mini kit (performing DNase treatment in the purification step) (Qiagen) and  
210 eluted from the resin twice using 50 µL of nuclease-free water followed by ethanol  
211 precipitation, and then dissolved in 10 µL of nuclease-free water.

212 To improve the success rate of the library preparation by AmpliSeq protocol, we modified  
213 the default protocol of the Ion AmpliSeq Transcriptome Human Gene Expression kit (Thermo

214 Fisher Scientific). Briefly, 1.75  $\mu$ L RNA solution was mixed with 0.5  $\mu$ L VILO Reaction Mix  
215 and 0.25  $\mu$ L SuperScript III Enzyme. Reverse transcription was performed at 25  $^{\circ}$ C for 10 min,  
216 42  $^{\circ}$ C for 90 min, and finally 85  $^{\circ}$ C for 5 min. The target DNA amplification was performed by  
217 mixing 2.5  $\mu$ L cDNA solution, 1.5  $\mu$ L nuclease-free water, 2.0  $\mu$ L Ion AmpliSeq HiFi Mix, and  
218 4.0  $\mu$ L Ion AmpliSeq Transcriptome Human Gene Expression Core Panel under the following  
219 conditions: 99  $^{\circ}$ C for 15 sec and 62  $^{\circ}$ C for 16 min for 20 cycles. The amplified DNA library was  
220 purified by mixing 10  $\mu$ L AMPure XP beads (Beckman Coulter, Miami, FL, USA) according to  
221 the manufacturer's protocol and eluted using 10  $\mu$ L nuclease-free water. The quality check of the  
222 DNA library was conducted using the High Sensitivity D1000 ScreenTape on Agilent 4200  
223 TapeStation. If the DNA library had amplified, a band of approximately 170 bp was observed.  
224 After checking the DNA library quality, the reaction solution was prepared by mixing 3.5  $\mu$ L  
225 purified library solution, 2.0  $\mu$ L Ion AmpliSeq HiFi Mix, 4.0  $\mu$ L Ion AmpliSeq Transcriptome  
226 Human Gene Expression Core Panel, and 0.5  $\mu$ L VILO Reaction Mix. After adding 1.0  $\mu$ L FuPa  
227 reagent to 10  $\mu$ L reconstituted reaction solution, the primer sequence was partially digested  
228 under the following conditions: 50  $^{\circ}$ C for 10 min, 55  $^{\circ}$ C for 10 min, and 60  $^{\circ}$ C for 20 min. To  
229 ligate the adaptor sequence, 2  $\mu$ L Switch solution, 1  $\mu$ L Ion Xpress Barcode adapters, and 1  $\mu$ L  
230 DNA ligase were added to 11  $\mu$ L reaction solution, followed by incubation at 22  $^{\circ}$ C for 60 min  
231 and 72  $^{\circ}$ C for 5 min. The library (15  $\mu$ L) ligated with the adaptor sequence was purified via

232 mixing with 18  $\mu$ L AMPure XP beads according to the manufacturer's protocol. Libraries were  
233 eluted using 50  $\mu$ L Library Amp Mix (Thermo Fisher Scientific) to which, 2  $\mu$ L Library Amp  
234 Primers were added. The library amplification was conducted using following steps: 98 °C for  
235 15 seconds and 64 °C for 1 min for five cycles. Next, 50  $\mu$ L PCR product was mixed with 25  $\mu$ L  
236 AMPure XP beads and the supernatant was transferred to fresh PCR tubes. The supernatants  
237 were mixed with 60  $\mu$ L AMPure XP beads and purified; target fragments were eluted from the  
238 beads using 10  $\mu$ L TE buffer. The quality check of the library was performed using the High  
239 Sensitivity D1000 ScreenTape on Agilent 4200 TapeStation.

240

## 241 **Sequencing**

242 The library was quantified using the Ion Library TaqMan™ Quantitation Kit (Thermo  
243 Fisher Scientific). After an input of 50 pM DNA library in the Ion Chef System (Thermo Fisher  
244 Scientific), template preparation and chip loading were performed, and RNA-seq was conducted  
245 on the Ion S5 XL System (Thermo Fisher Scientific).

246

## 247 **Verification of the correlation coefficient between AmpliSeq and qPCR results**

248 For identifying *RPLP0*, *CDSN*, and *CCLI7* expression in SSL-RNAs, cDNA was pre-  
249 amplified in 14 cycles using the TaqMan PreAmp Master Mix (Thermo Fisher Scientific) and

250 pooled TaqMan probe (*RPLP0*, *CDSN*, and *CCL17*) (Thermo Fisher Scientific) and then diluted  
251 5-fold with nuclease-free water. The qPCR was performed according to the aforementioned  
252 “mRNA extraction and qPCR” method. Expression value of *RPLP0* was used as an internal  
253 control. Correlation between the value of reads per million mapped reads (RPM) of AmpliSeq  
254 and the relative expression value of qPCR in healthy subjects and patients with AD was  
255 analyzed.

256

#### 257 **Laser microdissection (LMD) and AmpliSeq transcriptome analysis**

258 Frozen skin sections (thickness: 10  $\mu$ m) from three Caucasian males were mounted on  
259 membrane slides (PEN-Membrane 2.0  $\mu$ m, Leica Microsystems, Wetzlar, Germany) treated  
260 with 0.1 % (w/v) poly-L-lysine (Fujifilm Wako Pure Chemical, Osaka, Japan). In addition, two  
261 frozen sections were directly collected into 750  $\mu$ L RLT buffer (Qiagen) containing 40 mM  
262 dithiothreitol (Sigma-Aldrich) to analyze the transcriptome of the whole tissue. The LMD  
263 sections were fixed with acetone at -20  $^{\circ}$ C for 10 min, stained with 0.05 % (v/v) toluidine blue,  
264 and finally dried. Epidermis, sebaceous glands, sweat glands, hair follicles, and dermis were  
265 carefully microdissected from the skin sections using LMD7000 (Leica Microsystems). Fifteen  
266 target regions from three skin tissues were dissected and dissolved in 50  $\mu$ L RLT buffer  
267 containing 40 mM dithiothreitol. Total RNA was extracted and purified using the RNeasy mini



268 kit (performing DNase treatment in the purification step) (Qiagen). The RNA was concentrated  
269 via ethanol precipitation and dissolved in 10  $\mu$ L nuclease-free water. The RNA quality was  
270 checked on the 4200 TapeStation System and cDNA library was prepared for AmpliSeq  
271 transcriptome sequencing using 75 pg total RNA according to the method described in “Library  
272 preparation for Ion AmpliSeq”. The number of target amplification was changed from 20 to 18  
273 cycles except for dermis samples.

274

## 275 **Statistics, normalization, and differential expression analysis of the AmpliSeq whole**

### 276 **transcriptome**

277 All statistical analyses and normalization of the RNA-seq transcriptome data were performed  
278 using the R statistical language. Read counts were generated using the AmpliSeq RNA plugin in  
279 Ion Torrent Suite Software (Thermo Fisher Scientific) and normalized with the DESeq2 R  
280 package (Bioconductor). For differential expression analysis between healthy subjects and  
281 patients with AD, a likelihood ratio test was performed with DESeq2 using normalized counts.  
282 Heat maps were generated using the heatmap3 package. Dimensionality reduction using t-  
283 distributed stochastic neighbor embedding (t-SNE) was performed using the Rtsne function of  
284 the Rtsne package. All plots were generated using the tidyverse package in combination with the  
285 reshape2, gplots, ggplot2, grid, and cowplot packages.

## 286 **Results**

### 287 **Measurable human mRNA is present in SSLs**

288 qPCR was conducted to evaluate the mRNA abundance in SSL samples, stratum corneum,  
289 urine, serum, saliva, and sweat samples. The expression of *ACTB* and *GAPDH* mRNA in SSLs  
290 was comparable to their expression in 100 ng–500 pg and 1 ng–100 ng total RNA in NHEK,  
291 respectively, whereas these transcripts were largely undetectable in the other body fluid samples  
292 (Fig. 1a). The level of human mRNA degradation in SSLs could not be measured directly due to  
293 the presence of bacterial mRNA. Therefore, we established an assay to verify the quality of  
294 human mRNA in SSLs. The reverse primer was designed near the 3' end and was used with the  
295 forward primers to amplify 363 bp and 57 bp long human *ACTB* mRNA. After reverse  
296 transcription using oligo-dT primers, *ACTB* levels were quantified by performing qPCR using  
297 primers generating 363 bp and 57 bp human *ACTB* mRNA. In the case of *ACTB* mRNA of  
298 longer than 363 bp, both 363 and 57 bp fragments were amplified, whereas in case of *ACTB*  
299 mRNA of 57–363 bp, only the 57 bp fragment was amplified (Fig. 1b). This assay was validated  
300 using RNA subjected to artificial and gradual degradation using RNase. The gradually degraded  
301 RNA was analyzed to calculate the percentage of fragments containing > 200 nucleotides  
302 (DV200 value) (Fig. 1c, d). The DV200 values of gradually degraded RNAs negatively  
303 correlated with the abundance ratio of the 363 bp and 57 bp amplicons (Fig. 1e). The level of

304 human mRNA degradation in SSLs collected from six males was calculated using a standard  
305 curve (Fig. 1e) and showed a mean DV200 value of 56.5 % (Fig. 1f).

306

### 307 **Sebum lipids inhibit RNase activity**

308 Consistent with the results of a study reporting RNase 7 expression in human skin (19), we  
309 confirmed that RNase 7 was expressed in the sebaceous glands and epidermis and also detected  
310 in SSLs (Fig. 2a, b). Because there is high abundance of RNase on the surface of human skin, it  
311 was surprising to detect human mRNA in SSLs. This finding led us to hypothesize that sebum  
312 lipids inhibit RNase activity. Based on these results, we evaluated the influence of sebum lipids  
313 on recombinant RNase 7 activity. Intact cellular RNA and RNase 7 were incubated with or  
314 without sebum lipids from four subjects at 37 °C for 30 min. Interestingly, the 28S and 18S  
315 ribosomal RNAs were completely degraded after incubation with RNase 7 in the absence of  
316 sebum lipids; on the other hand, ribosomal RNAs were stable in the presence of lipids (Fig. 2c).

317 Next, we aimed to identify the key lipids that inhibit RNase 7 activity. The sebum lipids were  
318 separated into fractions A–D on a TLC plate (Fig. 2d), and the lipids were recovered from each  
319 fraction and subjected to the RNase 7 inhibition assay. We observed that while fractions A, B,  
320 and C decreased RNase 7 activity, the inhibitory effect of the fraction D was weak (Fig. 2e).

321 Triglycerides and esters in the sebum are hydrolyzed by the skin microbiome to generate free

322 fatty acids (FFAs). The FFAs in human sebum are predominantly composed of 16 carbon atoms  
323 (palmitic acid, 16:0; sapienic acid, 16:1 $\Delta$ 6; and palmitoleic acid, C16:1 $\Delta$ 9) (14). Therefore, we  
324 evaluated the inhibitory effects of free palmitoleic acids and various lipids with palmitoleic acid  
325 as their main fatty acid, on RNase activity. The free palmitoleic acids and other lipids was  
326 dissolved in the reaction buffer at 1 mg/mL or 100 mg/mL concentration, except cholesterol and  
327 wax esters, and cholesterol, which could not be dissolved at 100 mg/mL. Our results showed  
328 that FFAs strongly suppressed RNase activity at 1 mg/mL compared to other lipids (Fig. 2f).  
329 Moreover, FFAs of different chain lengths (myristoleic acid (C14:1) and oleic acid (C18:1)) also  
330 suppressed RNase 7 activity (Fig. 2g).

331

### 332 **Global expression analysis of SSL-RNAs**

333 For specific and comprehensive quantification of human mRNAs in SSLs, we performed the  
334 AmpliSeq transcriptome analysis that can perform multiplexed amplification of cDNA  
335 amplicons for more than 20,000 genes. Moreover, this method can analyze even small amounts  
336 of RNAs as well as degraded RNAs (20, 21). Although we attempted to prepare sequence  
337 libraries from SSL-RNAs based on the default protocol, our success rate was low. Since the data  
338 quality can be improved via optimization of the AmpliSeq protocol (22), we modified the  
339 experimental conditions for preparing the sequence library. In the modified protocol, we altered

340 the volume of reagents, standardized the conditions for reverse transcription and target  
341 amplification, and added a purification step after the target amplification to remove the primer  
342 dimers (Supplementary Method 1). With the new protocol, the success rate of the library  
343 preparation improved significantly and the AmpliSeq library was prepared with samples  
344 obtained from healthy subjects (91 %, 29/32) and patients with AD (100 %, 30/30). To analyze  
345 the experimental bias of our protocol, we verified the correlation between the expression results  
346 of AmpliSeq and qPCR of thymus and activation-regulated chemokine (*TARC/CCL17*) and  
347 corneodesmosin (*CDSN*), and observed a high correlation (*CCL17*, R = 0.81, *CDSN*, R = 0.87)  
348 (Fig. 3a). Furthermore, the correlation coefficients for the technical replicate of the reverse  
349 transcription (0.94 and 0.90) confirmed that our protocol had low experimental bias (Fig. 3b).

350

351 **The SSL-RNA expression profile predominantly reflects mRNA expression in sebaceous**  
352 **glands, epidermis, and hair follicles**

353 The regions of the sebaceous glands, epidermis, sweat glands, hair follicles, and dermis  
354 were isolated from the human skin sections using LMD followed by AmpliSeq transcriptome  
355 analysis (Supplementary Fig. 1a). Each region generated distinct clusters when  
356 multidimensional scaling (MDS) was performed to analyze the similarity of the transcriptome  
357 profile in different regions (Supplementary Fig. 1b). Next, we focused on the genes highly

358 expressed in each region (Supplementary Fig. 1c) (23–38). Genes encoding ELOVL fatty acid  
359 elongase 3 and 5 (*ELOVL3* and *ELOVL5*), perilipin 2 and 5 (*PLIN2* and *PLIN5*), and  
360 microsomal glutathione S-transferase 1 (*MGST1*) are highly expressed in sebaceous glands (23–  
361 26). In our study, these genes were highly expressed in sebaceous glands isolated via LMD than  
362 in other regions (Supplementary Fig. 1c). Other regions isolated by LMD also expressed region-  
363 characteristic genes, indicating that the LMD was performed successfully.

364 To gain further insight into the characteristics and origin of SSL-RNAs, we explored genes  
365 highly expressed in each region isolated by LMD. In each region, genes with a mean of  $\log_2$   
366 (normalized counts + 1) > 10, and with more than 1.5-fold differential expression compared to  
367 other region(s), were selected (Fig. 4). However, using these criteria, we did not find any gene  
368 selectively expressed in epidermis, due to its similarity with the hair follicles. Therefore, we  
369 listed epidermal genes with more than 1.5-fold differential expression than in sebaceous glands,  
370 sweat glands, and dermis. To obtain information regarding the origin of SSL-RNAs, the SSL-  
371 RNA profile of 29 healthy subjects was analyzed using the genes expressed characteristically at  
372 each region. The results presented in the heat map indicate that SSL-RNAs predominantly  
373 comprise mRNAs characteristic for sebaceous glands, epidermis, and hair follicles (Fig. 4).

374 The filaggrin (*FLG*), filaggrin 2 (*FLG2*) and aspartic peptidase retroviral like 1 (*ASPRV1*)  
375 that were expressed in the granular layer of epidermis (27–29), were abundantly expressed in

376 SSL-RNAs (Fig. 4). The genes encoding keratin 25, 27, and 71 (*KRT25*, *KRT27*, and *KRT71*,  
377 respectively) that are expressed in the inner root sheath of hair follicles (33, 34) were highly  
378 expressed in SSL-RNAs (Fig. 4). These results suggest that SSL-RNAs provide significant  
379 information regarding the granular layer of the epidermis and the inner root sheath of hair  
380 follicles.

381

### 382 **Comparison of SSL-RNAs expression between healthy subjects and patients with AD**

383 We analyzed SSL-RNAs from 29 healthy subjects and 30 patients with AD. The major  
384 output of the AmpliSeq data obtained with our modified method was as follows: i) the average  
385 number of reads was 11,456,318 in healthy subjects and 11,137,677 in patients with AD; ii) the  
386 average mapping ratio was 84.0 % in healthy subjects and 92.4 % in patients with AD; and iii)  
387 the average of the ratio of target detected genes was 44.8 % in healthy subjects and 50.2 % in  
388 patients with AD. First, we verified the expression of genes with significant differential  
389 expression in AD. Consistent with previous reports (39–42), our results in SSL-RNAs analysis  
390 showed that the expression of *CCL17*, interleukin 1 $\beta$  (*IL1B*), interleukin 13 (*IL13*), and S100  
391 calcium binding protein A9 (*S100A9*) significantly increased in patients with AD, but the  
392 expression of *FLG* and involucrin (*IVL*) was significantly decreased in the patients with AD  
393 compared to healthy subjects (Fig. 5a). In a previous study reporting a global gene expression

394 analysis in skin biopsy samples, genes related to the terminal differentiation of keratinocytes  
395 were significantly downregulated and those related to immune-mediated inflammation were  
396 upregulated in patients with AD compared with their expression levels in healthy subjects (39).  
397 Based on this report, we selected 12 genes related to terminal differentiation and 22 genes  
398 related to immune-mediated inflammation that were detected in SSL-RNAs and compared their  
399 expression patterns. Our results showed that the expression patterns of these genes in SSL-  
400 RNAs of patients with AD and healthy subjects were largely consistent with the previous report  
401 (Fig. 5b).

402 Moreover, the analysis of the dimensionality reduction using t-distributed stochastic  
403 neighbor embedding (t-SNE) and variance stabilizing transformation (VST) values in all genes  
404 showed that the healthy subjects and patients with AD could be distinctly classified into two  
405 groups (Fig. 6a). To identify the differential biological functions between healthy subjects and  
406 patients with AD, we extracted 918 upregulated and 1,033 downregulated genes in patients with  
407 AD (Fig. 6b). In the 833 upregulated genes, GO terms of “mRNA splicing” and “stimulatory C-  
408 type lectin receptor signaling pathway” were significantly enriched, while GO term “detection  
409 of chemical stimulus involved in sensory perception of smell and keratinocyte differentiation”  
410 was enriched in the 951 downregulated genes (Fig. 6c).

411 The sebum secretion is reduced in patients with AD than in healthy individuals (43);



412 however, the molecular mechanism underlying this reduction remains unknown. GO analysis  
413 was performed on 46 genes highly expressed in the sebaceous glands selected from the results  
414 of the LMD experiment (Fig. 4), which resulted in the enrichment of genes involved in lipid  
415 metabolism (Fig. 7a). The expression of 25 genes involved in lipid metabolism (GO:0006629)  
416 was downregulated in patients with AD compared to healthy individuals (Fig. 7b). Furthermore,  
417 genes encoding peroxisome proliferator-activated receptor alpha (*PPARA*), peroxisome  
418 proliferator-activated receptor gamma (*PPARG*), MYC proto-oncogene, bHLH transcription  
419 factor (*MYC*), transforming growth factor beta 1 (*TGFB1*), tumor protein p53 (*TP53*), and  
420 PR/SET domain 1 (*BLIMP1*) regulate sebocyte differentiation and sebum production *in vivo* and  
421 *ex vivo* (44–47). Among these gene, the expression of *TGFB1* was significantly upregulated in  
422 patients with AD than in healthy subjects (Fig. 7c).

423

424 **Discussion**

425 In this study, we found that mRNAs of measurable quantity and quality were present in skin  
426 surface lipids. Further, for the first time, we established a non-invasive and comprehensive  
427 method to profile skin mRNAs using SSLs conveniently collected from the skin surface with an  
428 oil blotting film.

429 A significant quantity of RNases is present on the skin surface, and extreme caution should  
430 be taken when handling mRNAs. However, unexpectedly, we found that mRNAs in SSLs  
431 escape RNase degradation due to the lipid components of the sebum and can be analyzed by  
432 AmpliSeq transcriptome sequencing. We analyzed the lipid components responsible for  
433 inhibiting the RNase activity and our results suggested that FFAs, triacylglycerol, and squalene  
434 contributed significantly to the RNase inhibitory activity of sebum. Due to inhibitory effects of  
435 lipids on RNases, we speculate that mRNAs may be less susceptible to RNases-mediated  
436 degradation in the lipid-rich/low-water environment of SSLs. In addition, the optimal pH for  
437 RNase activity is 6.5-8.0 (48), whereas the skin surface is generally weakly acidic (pH 4.1 to  
438 5.8) due to the presence of organic acids such as lactic acid (49); hence, these factors may  
439 collectively reduce the RNase activity in SSLs. It is known that sebum is secreted by sebaceous  
440 glands in the form of fine granules (4–5 nm) (50); however, there is no knowledge on the spatial  
441 arrangement of lipids, organic acids, and mRNAs in SSLs. Identifying the distribution of these

442 components, as well as the molecular interactions between them, is necessary to understand the  
443 precise stabilization mechanism of mRNA on the skin.

444 We established the method for comprehensive analysis of SSL-RNAs. Recent advances in  
445 sequence technology have made it possible to analyze even degraded mRNA. To prepare RNA-  
446 seq libraries, a minimum DV200 value of 30 % is generally recommended. Using our modified  
447 method, the DV200 of human mRNAs in SSLs was approximately 56.5 %, making it suitable  
448 for transcriptome analysis. However, when the sequence libraries were prepared according to  
449 the standard protocol of Ion AmpliSeq Transcriptome Human Gene Expression Kit, the success  
450 rate was very low. Use of the optimized protocol (by standardizing conditions of reverse  
451 transcription and target amplification, and adding a purification step after target amplification)  
452 led to significant improvement in library production efficiency, and the transcriptome  
453 sequencing resulted in a success rate of 95 %. Further, the analytical error of this method was  
454 low and the results showed high correlation with qPCR results. Thus, our SSL-RNA analysis  
455 method using the improved AmpliSeq protocol enables profiling of the mRNA expression in  
456 SSLs in a reliable manner.

457 We investigated the origin of the SSL-RNAs by comparing their mRNA expression profile  
458 with those of different regions of the skin. Holocrine secretion of sebum made us speculate that  
459 the expression pattern of SSL-RNAs should be similar to that of the sebaceous glands. Indeed,

460 analysis of different regions of the skin obtained by LMD showed that the mRNAs derived from  
461 the sebaceous glands were highly expressed in SSL-RNAs. However, SSL-RNAs were rich not  
462 only in mRNAs derived from sebaceous glands but also in those derived from the epidermis and  
463 hair follicles, the tissues in close contact with the sebum. In contrast, the mRNAs characteristic  
464 of sweat glands and dermis, which are not in close contact with sebum, were absent in SSLs.

465 The mechanism underlying transfer of epidermal mRNAs into SSLs remain unclear, and  
466 there could be several possible mechanisms. The mRNAs characteristic of the granular layer of  
467 the epidermis (transcribed from *FLG*, *FLG2* and *ASPRVI*) were highly expressed in SSL-RNAs.  
468 In addition, stratum corneum is reported to contain detectable amounts of mRNA (13–15). We  
469 speculate that the epidermal mRNAs transferred to the surface of the stratum corneum due to  
470 keratinization are mixed with the sebum on the skin surface, leading to their presence in SSLs.  
471 The SSLs also contained hair follicle-derived RNAs, which may be related to the anatomical  
472 features of the hair follicle. SSL-RNAs were rich in mRNAs of *KRT25*, *KRT27*, and *KRT71*, the  
473 marker genes for the inner root sheath (33, 34). The inner root sheath detaches from the hair  
474 shaft and degrades during hair growth, and the process occurs at the orifice of the sebaceous  
475 duct (51). These observations indicate that the epithelial cells of the inner root sheath may get  
476 mixed with sebum at the orifice and skin surface, and as a result, information pertaining to the  
477 hair follicles may be reflected in the SSL-RNAs. In addition, since extracellular vesicles

478 released from various cells contain several biomolecules including mRNAs (52, 53), it is  
479 possible that extracellular vesicles-derived mRNAs are also included in the SSL-RNAs.  
480 Collectively, our results indicate that SSL-RNAs predominantly contains mRNAs derived from  
481 the sebaceous glands, epidermis, and hair follicles, and are therefore, a useful resource for  
482 analyzing the biological information related to the relevant regions of the skin.

483 Finally, we verified the applicability of this method by performing a comparative analysis of  
484 the SSL-RNAs profiles of healthy subjects and patients with AD. We observed that the  
485 transcriptome profile was markedly different between healthy subjects and patients with AD,  
486 with differential expression of immune-mediated inflammation and terminal differentiation-  
487 related genes, as shown in a previous skin biopsy report (39). Moreover, the GO term “detection  
488 of chemical stimulus involved in sensory perception of smell” identified in our study was  
489 consistent with a previous report based on patients with AD (13) indicating that the analysis of  
490 SSL-RNAs successfully captured the characteristics of AD. Atrophy of the sebaceous glands  
491 and reduction in sebum secretion have been reported in patients with AD (54). However, little is  
492 known about the underlying mechanism, including the gene expression profile of sebaceous  
493 glands, in patients with AD due to difficulty in obtaining facial skin tissue samples containing  
494 sebaceous glands. Here, we showed that the expressions of 25 lipid metabolism-related genes  
495 highly expressed in sebaceous glands were lower in AD patients than in healthy subjects.

496 Moreover, the expression of *TGFBI*, which suppresses sebocyte differentiation and lipid  
497 accumulation (47), was significantly increased in patients with AD, suggesting that the  
498 suppression of lipid synthesis via *TGFBI* may be one of the mechanisms responsible for  
499 dysregulated sebum synthesis in these patients. Thus, the transcriptome analysis of SSL-RNAs  
500 can evaluate the molecular profile of AD in a non-invasive manner, and is a promising method  
501 for comprehensive understanding of AD pathology.

502 In summary, we established a non-invasive method for SSL-RNA analysis that utilizes SSL  
503 samples collected by simply wiping the skin surface for less than a minute. This non-invasive  
504 method has potential application in unraveling the molecular profile of skin diseases, such as  
505 AD, which will be helpful for clinical management of these diseases in future. Understanding  
506 the status and course of AD at the molecular level is essential not only to assess the  
507 pathophysiology of AD but also to design its effective therapeutic treatments. The clinical  
508 phenotypes of AD are extremely complex, warranting the need for identifying biomarkers that  
509 can classify invisible endophenotypes (55). Further, since the skin is called “the disease-sensor  
510 organ” (56) and is believed to reflect the conditions inside the body, the SSL-RNA analysis may  
511 have wide applicability to understand various pathologies of human body.

512

513 **Data availability**

514 The datasets generated and analyzed in the current study are available from the  
515 corresponding author on reasonable request.

516

517 **References**

- 518 1) Droujinine, I. A. & Perrimon, N. Interorgan communication pathways in physiology: focus  
519 on *Drosophila*. *Annu. Rev. Genet.* **50**, 539-570 (2016).
- 520 2) Heikenfeld, J. et al. Accessing analytes in biofluids for peripheral biochemical  
521 monitoring. *Nat. Biotechnol.* **37**, 407-419 (2019).
- 522 3) Yokoi, A. et al. Integrated extracellular microRNA profiling for ovarian cancer  
523 screening. *Nat. Commun.* **9**, 4319 (2018).
- 524 4) Sudo, K. et al. Development and validation of an esophageal squamous cell carcinoma  
525 detection model by large-scale microRNA profiling. *JAMA Netw. Open* **2**, e194573 (2019).
- 526 5) Yasui, T. et al. Unveiling massive numbers of cancer-related urinary-microRNA candidates  
527 via nanowires. *Sci. Adv.* **3**, e1701133 (2017).
- 528 6) Paliwal, S., Hwang, B. H., Tsai, K. Y. & Mitragotri, S. Diagnostic opportunities based on  
529 skin biomarkers. *Eur. J. Pharm. Sci.* **50**, 546-556 (2013).
- 530 7) Wester, V. L. & van Rossum, E. F. C. Clinical applications of cortisol measurements in

- 531 hair. *Eur. J. Endocrinol.* **173**, M1-10 (2015).
- 532 8) Gao, W. et al. Fully integrated wearable sensor arrays for multiplexed in situ perspiration  
533 analysis. *Nature* **529**, 509-514 (2016).
- 534 9) Moyer, J., Wilson, D., Finkelshtein, I., Wong, B. & Potts, R. Correlation between sweat  
535 glucose and blood glucose in subjects with diabetes. *Diabetes Technol. Ther.* **14**, 398-402  
536 (2012).
- 537 10) Park, J. H. P. et al. An antimicrobial protein, lactoferrin exists in the sweat: proteomic  
538 analysis of sweat. *Exp. Dermatol.* **20**, 369-371 (2011).
- 539 11) Bengtsson, C. F. et al. DNA from keratinous tissue. Part I: hair and nail. *Ann. Anat.* **194**, 17-  
540 25 (2012).
- 541 12) Wong, R. et al. Use of RT-PCR and DNA microarrays to characterize RNA recovered by  
542 non-invasive tape harvesting of normal and inflamed skin. *J. Invest. Dermatol.* **123**, 159-  
543 167 (2004).
- 544 13) Dyjack, N. et al. Minimally invasive skin tape strip RNA sequencing identifies novel  
545 characteristics of the type 2-high atopic dermatitis disease endotype. *J. Allergy Clin.*  
546 *Immunol.* **141**, 1298-1309 (2018).
- 547 14) He, H. et al. Tape strips detect distinct immune and barrier profiles in atopic dermatitis and  
548 psoriasis. *J. Allergy Clin. Immunol.* **147**, 199-212 (2021).



- 549 15) Pavel, A. B. et al. Tape strips from early-onset pediatric atopic dermatitis highlight disease  
550 abnormalities in nonlesional skin. *Allergy*. **76**, 314-325 (2021).
- 551 16) Leung, D. Y. M. et al. The nonlesional skin surface distinguishes atopic dermatitis with food  
552 allergy as a unique endotype. *Sci. Transl. Med.* **11**, eaav2685 (2019).
- 553 17) Peppelman, M., van den Eijnde, W. A. J., Jaspers, E. J., Gerritsen, M-J. P. & van Erp, P. E. J.  
554 Combining tape stripping and non-invasive reflectance confocal microscopy : an *in vivo*  
555 model to study skin damage. *Skin Res. Technol.* **21**, 474-484 (2015).
- 556 18) Schneider, M. R. & Paus, R. Sebocytes, multifaceted epithelial cells: lipid production and  
557 holocrine secretion. *Int. J. Biochem. Cell Biol.* **42**, 181-185 (2010).
- 558 19) Köten, B. et al. RNase 7 contributes to the cutaneous defense against *Enterococcus*  
559 *faecium*. *PLoS One* **4**, e6424 (2009).
- 560 20) Li, W. et al. Comprehensive evaluation of AmpliSeq transcriptome, a novel targeted whole  
561 transcriptome RNA sequencing methodology for global gene expression analysis. *BMC*  
562 *Genomics* **16**, 1069 (2015).
- 563 21) Wang, Z., Lyu, Z., Pan, L., Zeng, G. & Randhawa, P. Defining housekeeping genes suitable  
564 for RNA-seq analysis of the human allograft kidney biopsy tissue. *BMC Med. Genomics* **12**,  
565 86 (2019).
- 566 22) Fitzgerald, L. M. et al. Obtaining high quality transcriptome data from formalin-fixed,

- 567 paraffin-embedded diagnostic prostate tumor specimens. *Lab. Invest.* **98**, 537-550 (2018).
- 568 23) Westerberg, R. et al. Role for ELOVL3 and fatty acid chain length in development of hair  
569 and skin function. *J. Biol. Chem.* **279**, 5621-5629 (2004).
- 570 24) Kitago, M. et al. Localization of the candidate genes ELOVL5 and SCD1 for ‘male effect’  
571 pheromone synthesis in goats (*Capra hircus*). *J. Reprod. Dev.* **53**, 1329-1333 (2007).
- 572 25) Dahlhoff, M. et al. PLIN2, the major perilipin regulated during sebocyte differentiation,  
573 controls sebaceous lipid accumulation in vitro and sebaceous gland size in vivo. *Biochim.*  
574 *Biophys. Acta* **1830**, 4642-4649 (2013).
- 575 26) Joost, S. et al. Single-cell transcriptomics reveals that differentiation and spatial signatures  
576 shape epidermal and hair follicle heterogeneity. *Cell Syst* **3**, 221-237.e9 (2016).
- 577 27) Zhang, Y. et al. Activation of beta-catenin signaling programs embryonic epidermis to hair  
578 follicle fate. *Development* **135**, 2161-2172 (2008).
- 579 28) Makino, T., Mizawa, M., Yamakoshi, T., Takaishi, M. & Shimizu, T. Expression of  
580 filaggrin-2 protein in the epidermis of human skin diseases: a comparative analysis with  
581 filaggrin. *Biochem. Biophys. Res. Commun.* **449**, 100-106 (2014).
- 582 29) Donovan, M. et al. Filaggrin and filaggrin 2 processing are linked together through skin  
583 aspartic acid protease activation. *PLoS One* **15**, e0232679 (2020).
- 584 30) Gao, Y. et al. Isolation, culture and phenotypic characterization of human sweat gland

- 585 epithelial cells. *Int. J. Mol. Med.* **34**, 997-1003 (2014).
- 586 31) Rieg, S., Garbe, C., Sauer, B., Kalbacher, H. & Schitteck, B. Dermcidin is constitutively  
587 produced by eccrine sweat glands and is not induced in epidermal cells under inflammatory  
588 skin conditions. *Br. J. Dermatol.* **151**, 534-539 (2004).
- 589 32) Miura, K. et al. Homeobox transcriptional factor engrailed homeobox 1 is expressed  
590 specifically in normal and neoplastic sweat gland cells. *Histopathology* **72**, 1199-1208  
591 (2018).
- 592 33) Langbein, L. et al. K25 (K25irs1), K26 (K25irs2), K27 (K25irs3), and K28 (K25irs4)  
593 represent the type I inner root sheath keratins of the human hair follicle. *J. Invest.*  
594 *Dermatol.* **126**, 2377-2386 (2006).
- 595 34) Langbein, L., Yoshida, H., Praetzel-Wunder, S., Parry, D. A. & Schweizer, J. The keratins of  
596 the human beard hair medulla: the riddle in the middle. *J. Invest. Dermatol.* **130**, 55-73  
597 (2010).
- 598 35) Kutz, W. E. et al. ADAMTS10 protein interacts with fibrillin-1 and promotes its deposition  
599 in extracellular matrix of cultured fibroblasts. *J. Biol. Chem.* **286**, 17156-17167 (2011).
- 600 36) Le Goff, C. et al. Regulation of procollagen amino-propeptide processing during mouse  
601 embryogenesis by specialization of homologous ADAMTS proteases: insights on collagen  
602 biosynthesis and dermatosparaxis. *Development* **133**, 1587-1596 (2006).

- 603 37) Warrick, E. et al. Morphological and molecular characterization of actinic lentigos reveals  
604 alterations of the dermal extracellular matrix. *Br. J. Dermatol.* **177**, 1619-1632 (2017).
- 605 38) Moustou, A. E. et al. Expression of lymphatic markers and lymphatic growth factors in  
606 psoriasis before and after anti-TNF treatment. *An. Bras. Dermatol.* **89**, 891-897 (2014).
- 607 39) Suárez-Fariñas, M. et al. Nonlesional atopic dermatitis skin is characterized by broad  
608 terminal differentiation defects and variable immune abnormalities. *J. Allergy Clin.*  
609 *Immunol.* **127**, 954-64.e1-4 (2011).
- 610 40) Nomura, I. et al. Cytokine milieu of atopic dermatitis, as compared to psoriasis, skin  
611 prevents induction of innate immune response genes. *J. Immunol.* **171**, 3262-3269 (2003).
- 612 41) Bianchi, P. et al. Analysis of gene expression in atopic dermatitis using a microabrasive  
613 method. *J. Invest. Dermatol.* **132**, 469-472 (2012).
- 614 42) Gittler, J. K. et al. Progressive activation of T(H)2/T(H)22 cytokines and selective  
615 epidermal proteins characterizes acute and chronic atopic dermatitis. *J. Allergy Clin.*  
616 *Immunol.* **130**, 1344-1354 (2012).
- 617 43) Furuichi, M. et al. The usefulness of sebum check film for measuring the secretion of  
618 sebum. *Arch. Dermatol. Res.* **302**, 657-660 (2010).
- 619 44) Trivedi, N. R. et al. Peroxisome proliferator-activated receptors increase human sebum  
620 production. *J. Invest. Dermatol.* **126**, 2002-2009 (2006).

- 621 45) Cottle, D. L. et al. c-MYC-induced sebaceous gland differentiation is controlled by an  
622 androgen receptor/p53 axis. *Cell Rep.* **3**, 427-441 (2013).
- 623 46) Horsley, V. et al. Blimp1 defines a progenitor population that governs cellular input to the  
624 sebaceous gland. *Cell* **126**, 597-609 (2006).
- 625 47) McNairn, A. J. et al. TGF $\beta$  signaling regulates lipogenesis in human sebaceous glands cells.  
626 *BMC Dermatol.* **13**, 2 (2013).
- 627 48) Sorrentino, S. The eight human "canonical" ribonucleases: molecular diversity, catalytic  
628 properties, and special biological actions of the enzyme proteins. *FEBS Lett.* **584**, 2194-  
629 2200 (2010).
- 630 49) Lambers, H., Piessens, S., Bloem, A., Pronk, H. & Finkel, P. Natural skin surface pH is on  
631 average below 5, which is beneficial for its resident flora. *Int. J. Cosmet. Sci.* **28**, 359-370  
632 (2006).
- 633 50) Sheu, H. M., Chao, S. C., Wong, T. W., Yu-Yun Lee, J. & Tsai, J. C. Human skin surface  
634 lipid film: an ultrastructural study and interaction with corneocytes and intercellular lipid  
635 lamellae of the stratum corneum. *Br. J. Dermatol.* **140**, 385-391 (1999).
- 636 51) Sundberg, J. P. et al. Asebia-2J (Scd1ab2J): A new allele and a model for scarring  
637 alopecia. *Am. J. Pathol.* **156**, 2067-2075 (2000).
- 638 52) Xiao, D. et al. Identifying mRNA, microRNA and protein profiles of melanoma

- 639 exosomes. *PLoS One* **7**, e46874 (2012).
- 640 53) Wu, C.-X. & Liu, Z.-F. Proteomic profiling of sweat exosome suggests its involvement in
- 641 skin immunity. *J. Invest. Dermatol.* **138**, 89-97 (2018).
- 642 54) Shi, V. Y. et al. Role of sebaceous glands in inflammatory dermatoses. *J. Am. Acad.*
- 643 *Dermatol.* **73**, 856-863 (2015).
- 644 55) Muraro, A. et al. Precision medicine in patients with allergic diseases: airway diseases and
- 645 atopic dermatitis-PRACTALL document of the European Academy of Allergy and Clinical
- 646 Immunology and the American Academy of Allergy, Asthma & Immunology. *J. Allergy*
- 647 *Clin. Immunol.* **137**, 1347-1358 (2016).
- 648 56) Kozawa, S. et al. The body-wide transcriptome landscape of disease models. *iScience* **2**,
- 649 238-268 (2018).
- 650

651 **Author Contributions**

652 T.I. conceived the study. T.I., A.H., Y.T., and T.M. planned the study. T.I., T.K., Y.U., M.Y.,  
653 and N.Oy. performed the experiments and analyzed the data. T.M., Y.T., and N.Ot. supervised  
654 the research. T.I. and T.M. wrote the manuscript. All authors reviewed the manuscript.

655

656 **Competing Interests statement**

657 A patent application related to this work has been filed (No. PCT/JP2017/021040,: “Method  
658 for preparing nucleic acid sample.” Status: patent granted (DE, FR, GB, KR, JP), patent pending  
659 (CN, US). Inventors: T.I. and A.H. Patent applicant: Kao Corporation). All other co-authors  
660 declare that they have no competing interests.

661

## Figure 1

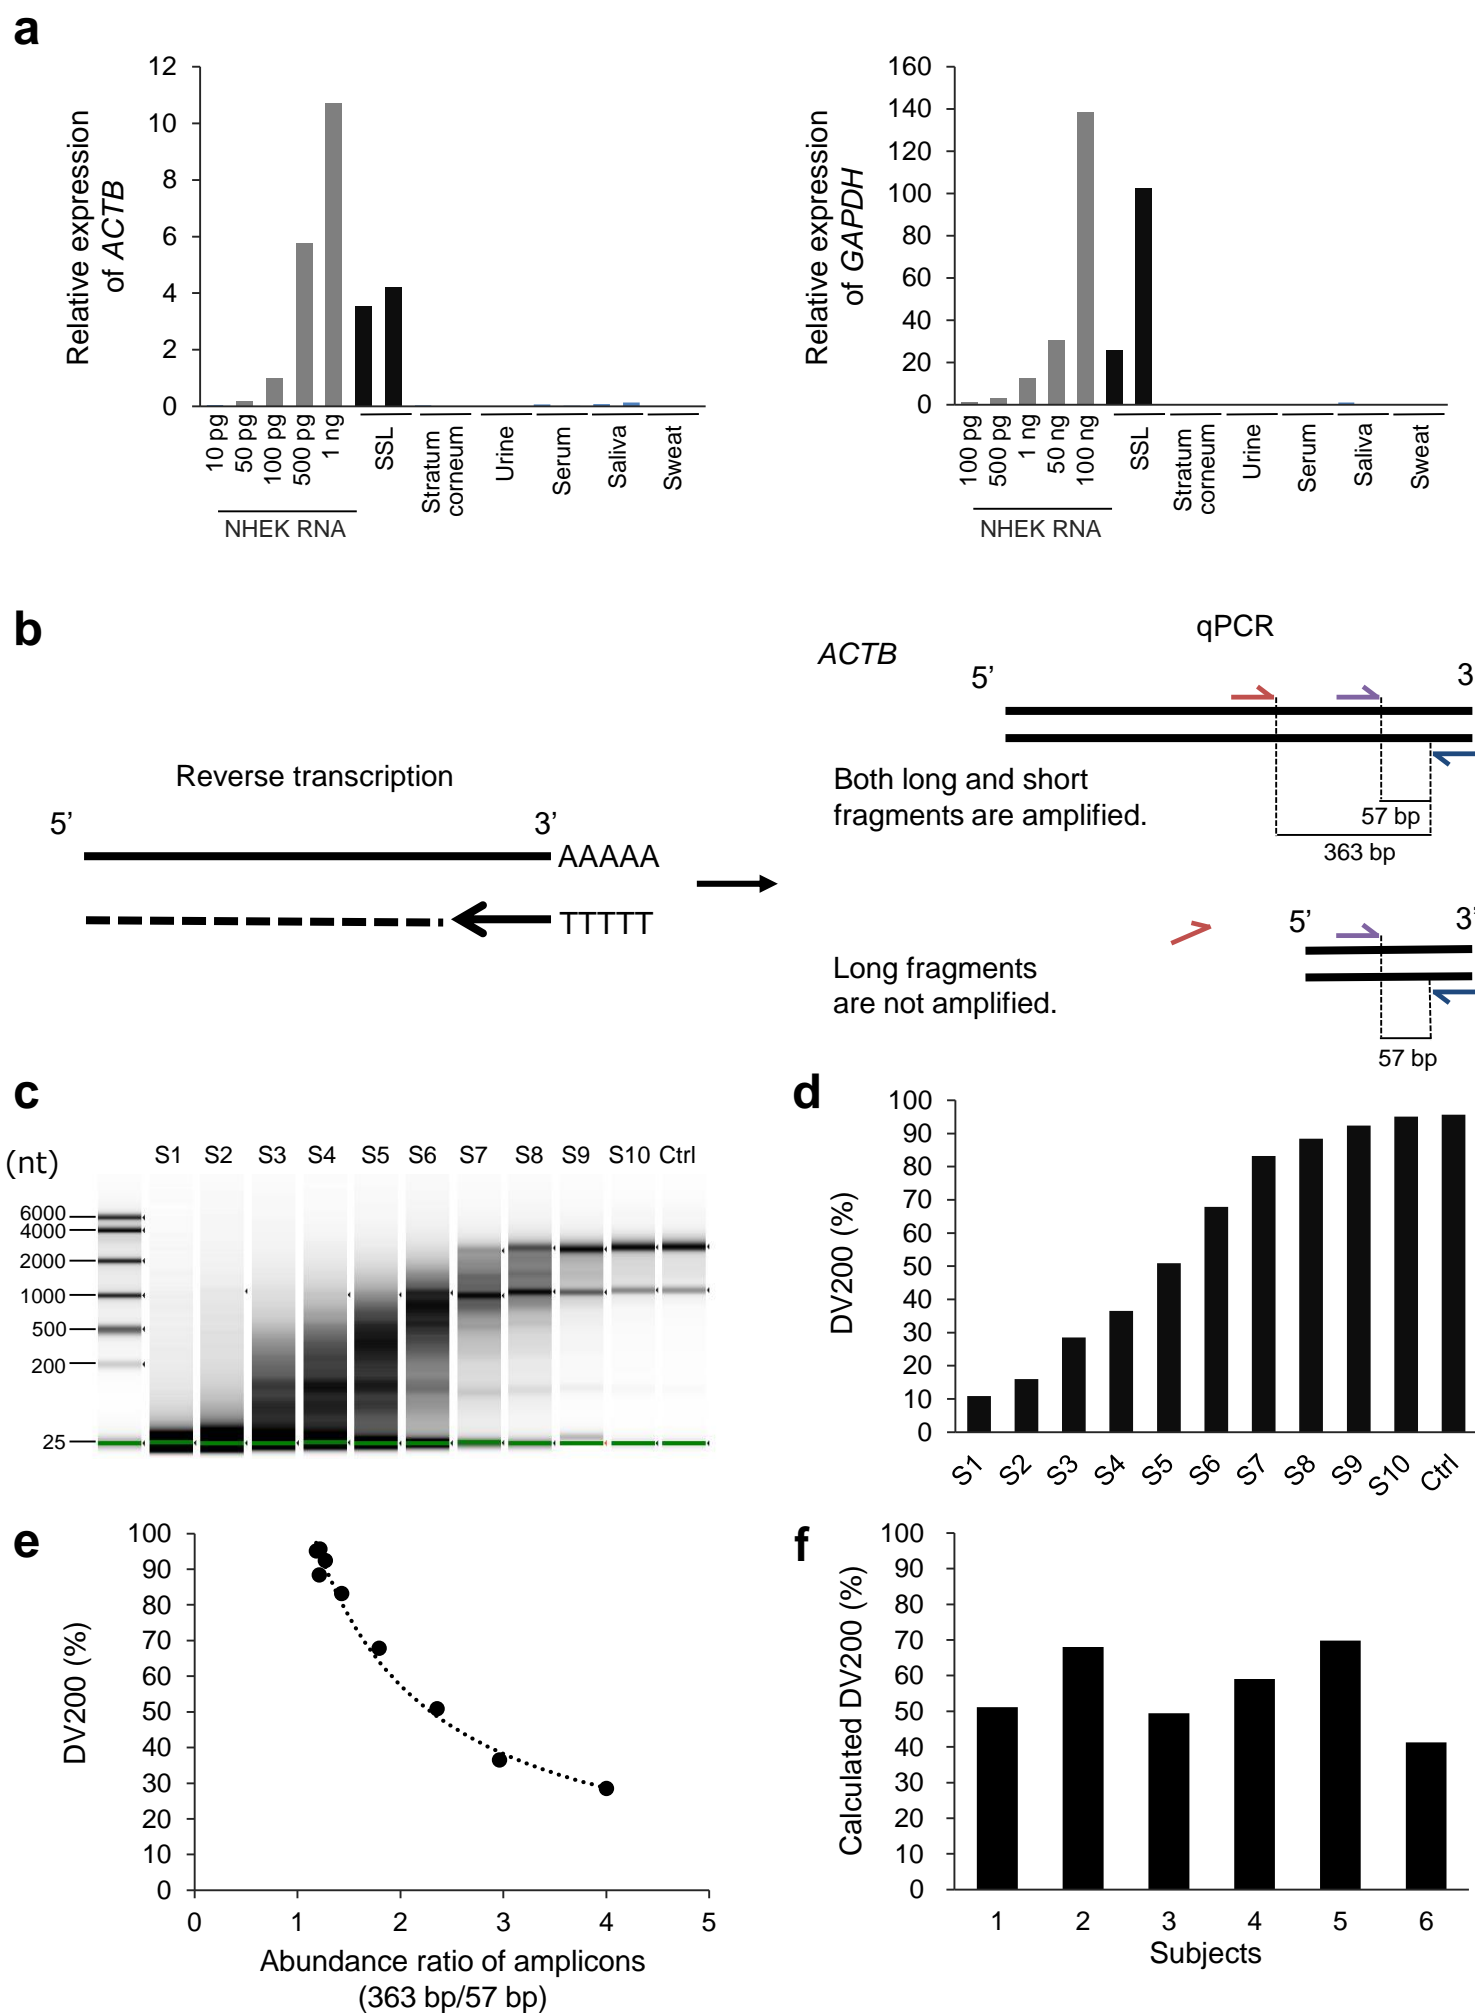



Figure 1. Evaluation of mRNA expression and RNA degradation in skin surface lipids (SSLs)

**(a)** Expression of *ACTB* and *GAPDH* mRNA in SSLs, stratum corneum, urine, serum, saliva, and sweat samples analyzed by qPCR. Gene expression is shown as the relative expression for 100 pg of RNA derived from normal human epidermal keratinocytes (NHEK). NHEK total RNA (10 pg to 100 ng) is the standard used. **(b)** Outline for assaying the degradation of human mRNA in SSLs. The extent of mRNA degradation was determined using the long (363 bp)/short (57 bp) amplicon ratio calculated from qPCR results. **(c)** Preparation of RNA samples with different levels of degradation. A series of standards (S1 to S10) are presented with known level of RNA degradation. **(d)** DV200 value indicating the percentage of fragments containing > 200 nucleotides, of **1c**. **(e)** The relationship between the DV200 of **1d** and the value of 363 bp/57 bp (abundance of 363 bp amplicon/abundance of 57 bp amplicon measured by qPCR). **(f)** The indirect assessment of the human mRNA degradation in SSLs, n = 6. DV200 of each SSL-RNA sample was calculated using the standard curve of **1e**.

## Figure 2

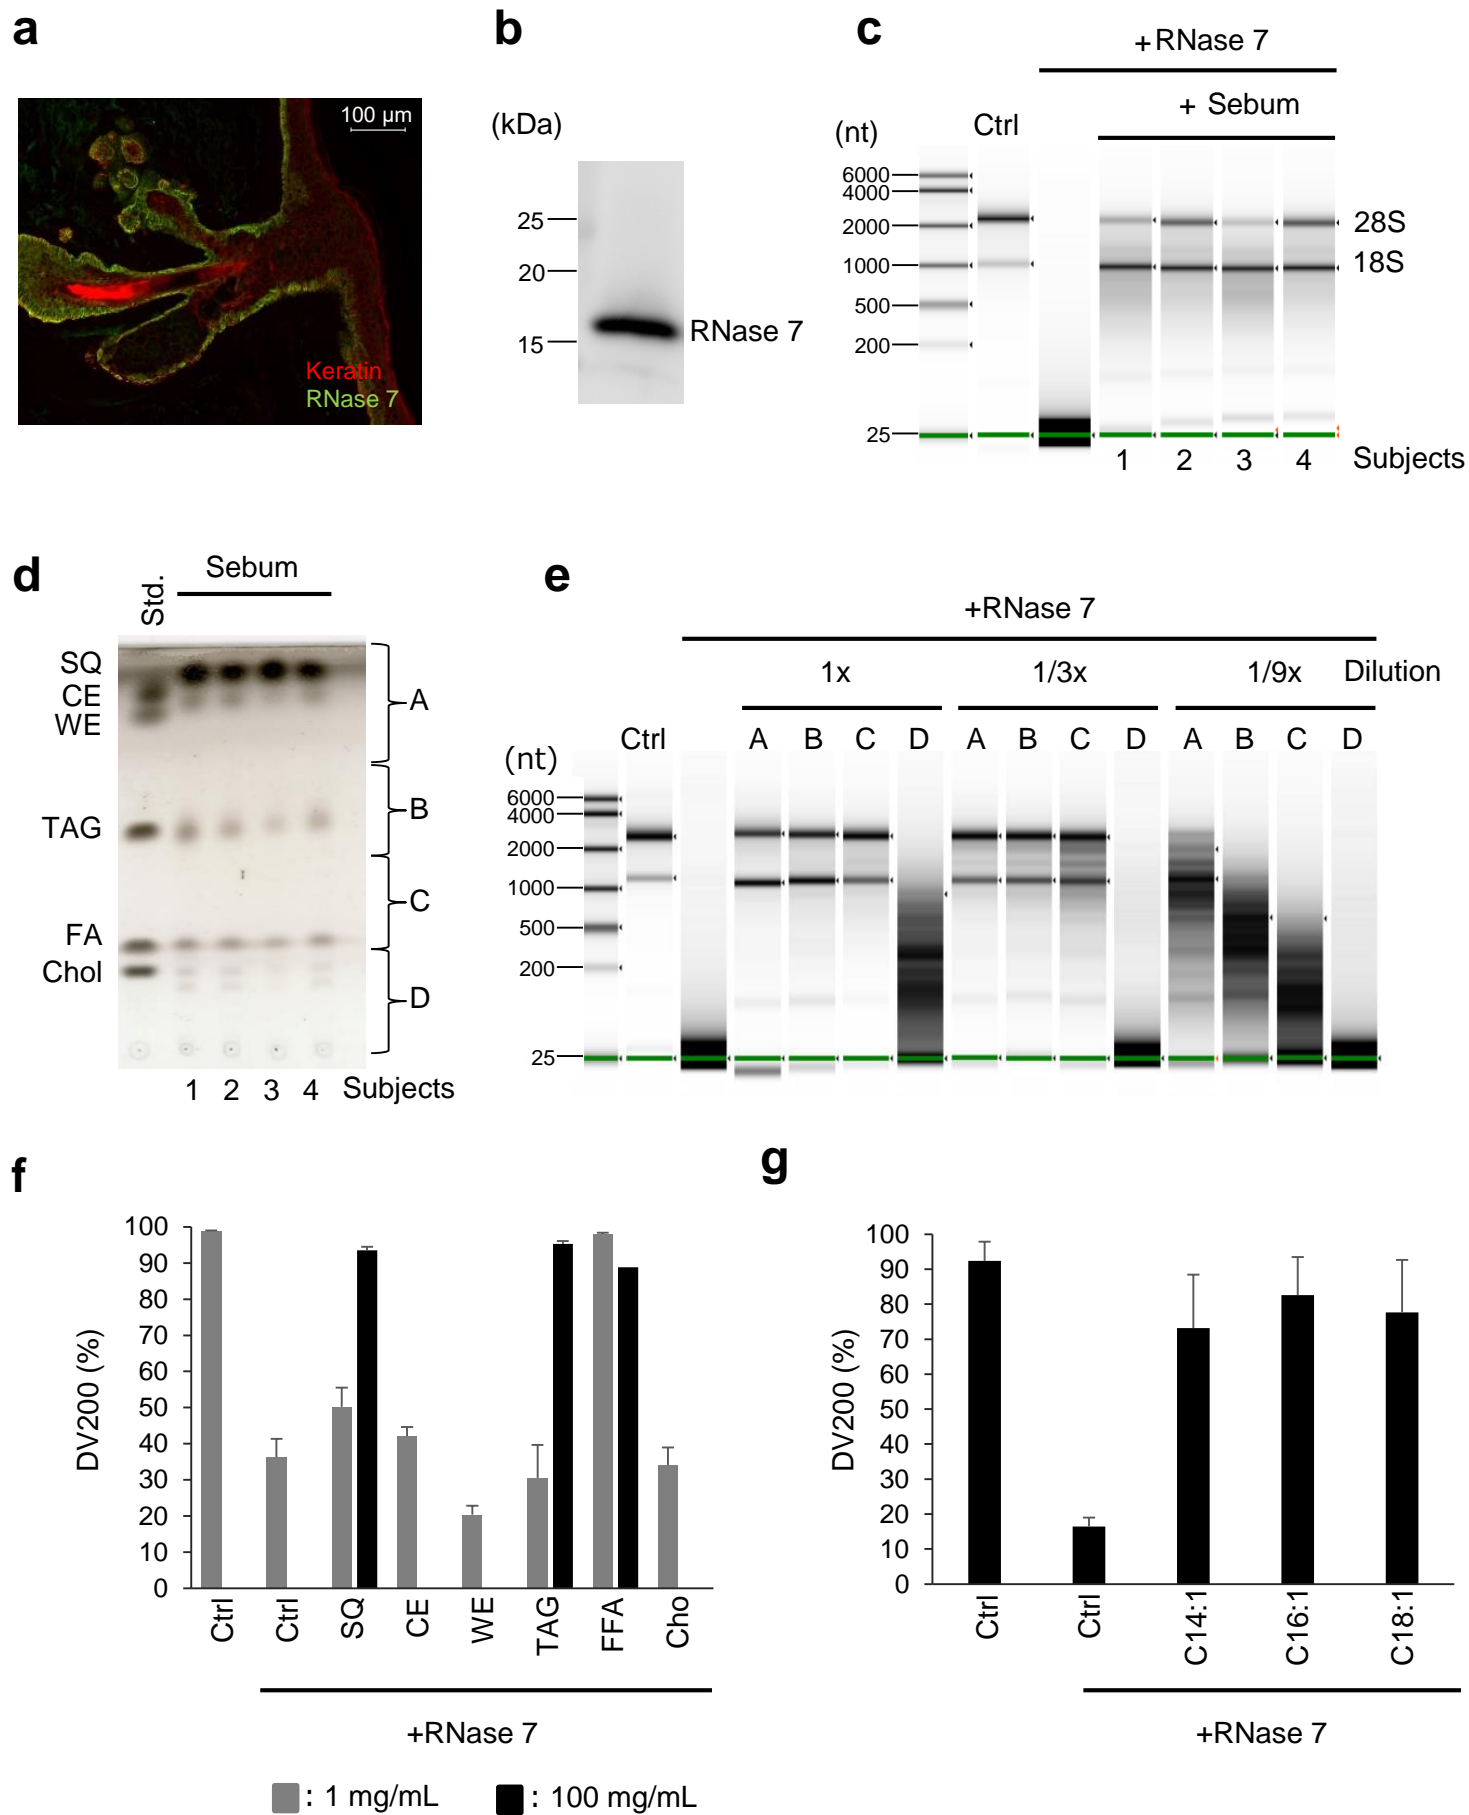

## Figure 2. Effect of sebum lipids on RNase activity

**(a)** The localization of RNase 7 in the human skin. Green, RNase 7; red, keratin/cytokeratin. Bar: 100  $\mu$ m. **(b)** The detection of RNase 7 in SSLs collected from healthy males by western blotting. **(c)** Determination of the effect of sebum lipids collected from four healthy males on RNase activity using NHEK total RNA. **(d)** Fractionation of sebum lipids collected from four healthy males by performing thin-layer chromatography (TLC). The standard lane (Std) includes authentic samples: SQ, squalene; CE, cholesterol ester (cholesteryl palmitate); WE, wax ester (lauryl palmitoleate); TAG, triacylglycerol (glyceryl trioleate); FA, free fatty acid (palmitoleic acid); and Chol, cholesterol. A to D sebum samples were collected, and lipids were extracted from the silica gel for the subsequent assays. **(e)** Effect of pooled sebum lipids collected from A to D on RNase activity using NHEK RNA. **(f)** Effect of each lipid on RNase activity using NHEK RNA. The DV200 values are shown as mean  $\pm$  SE, n = 3. WE, wax ester (behenyl palmitoleate); TAG, triacylglycerol (glyceryl tripalmitoleate); Ctrl; EtOH. **(g)** Relationship between RNase activity and chain length of fatty acids. The DV200 values are shown as the mean  $\pm$  SE, n = 6. C14:1, myristoleic acid; C16:1, palmitoleic acid; C18:1, oleic acid; Ctrl; EtOH.

### Figure 3

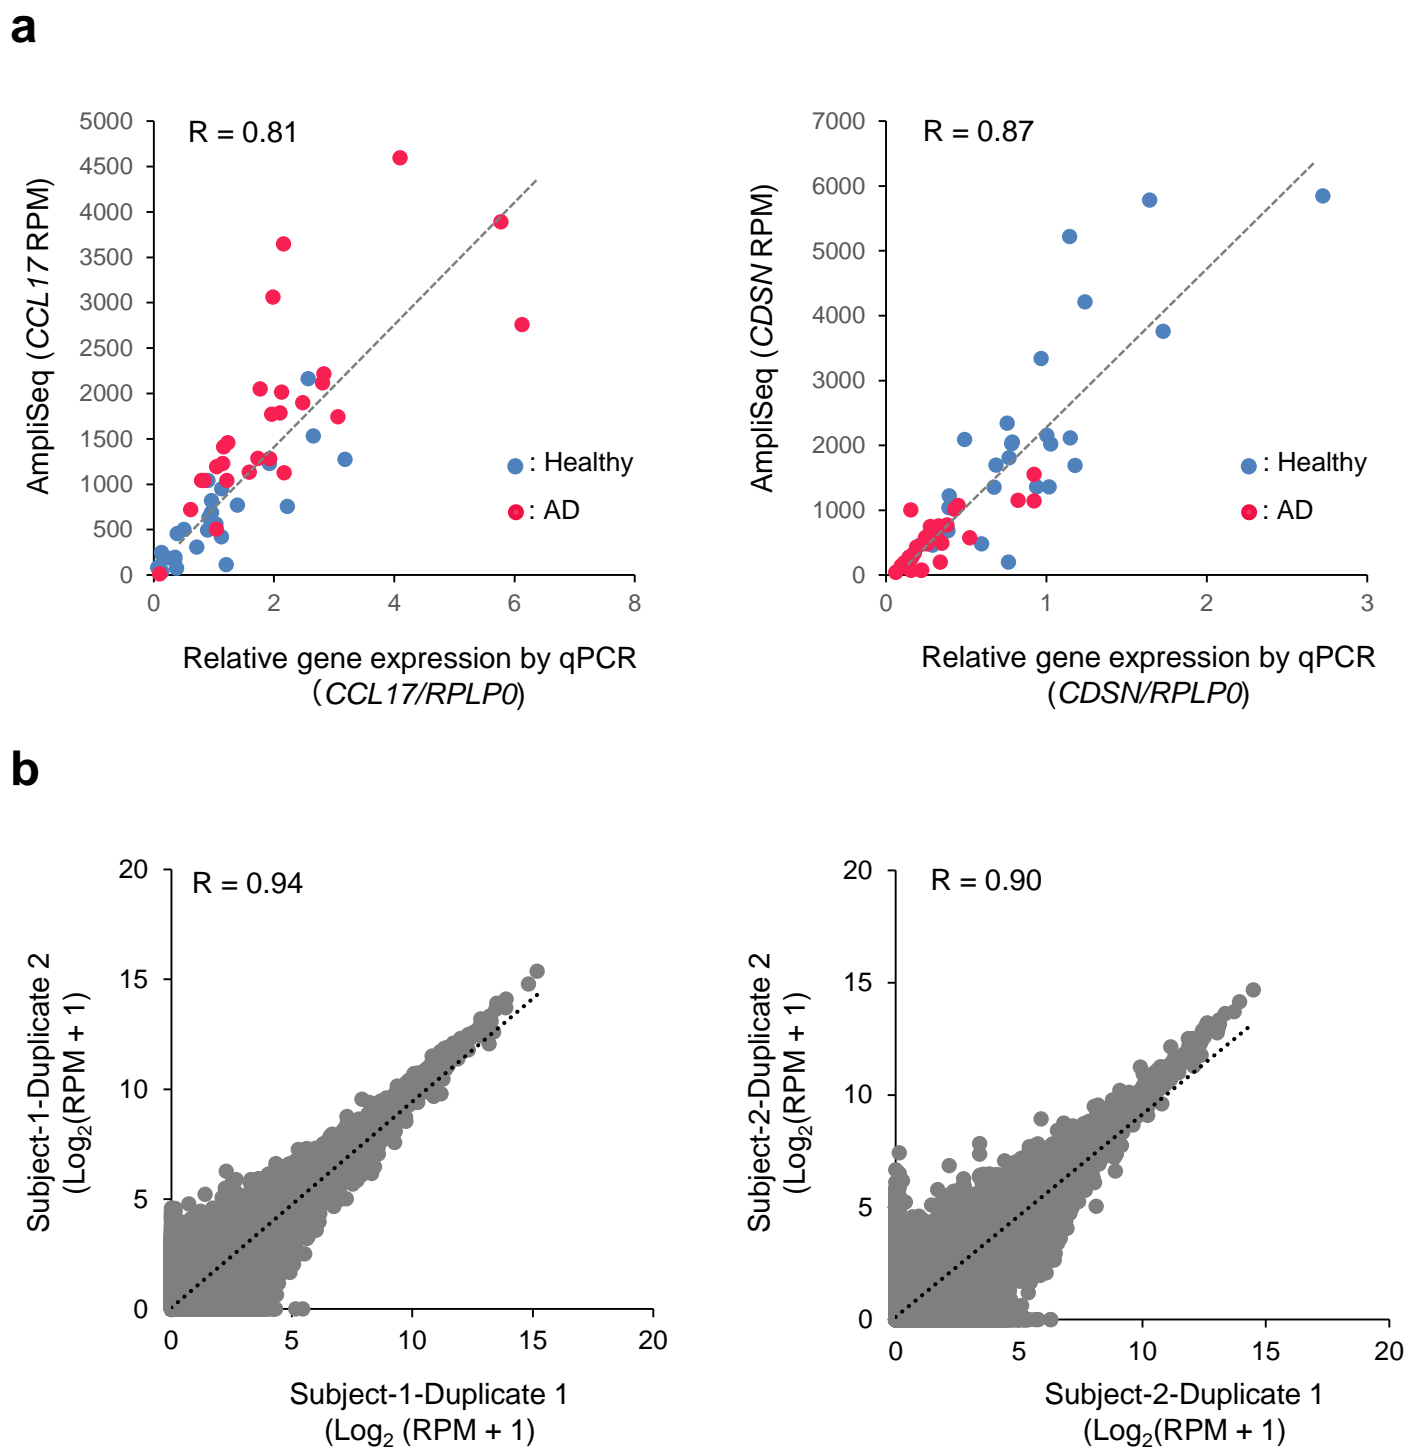

Figure 3. Accuracy of the AmpliSeq data output using the modified protocol

**(a)** The correlation between AmpliSeq and qPCR results for *CCL17* and *CDSN* expression in healthy subjects ( $n = 29$ , blue) and patients with AD ( $n = 30$ , red). **(b)** The correlation of the transcriptome profile when preparing libraries in duplicate from each SSL-RNA obtained from two healthy male subjects.

Figure 4

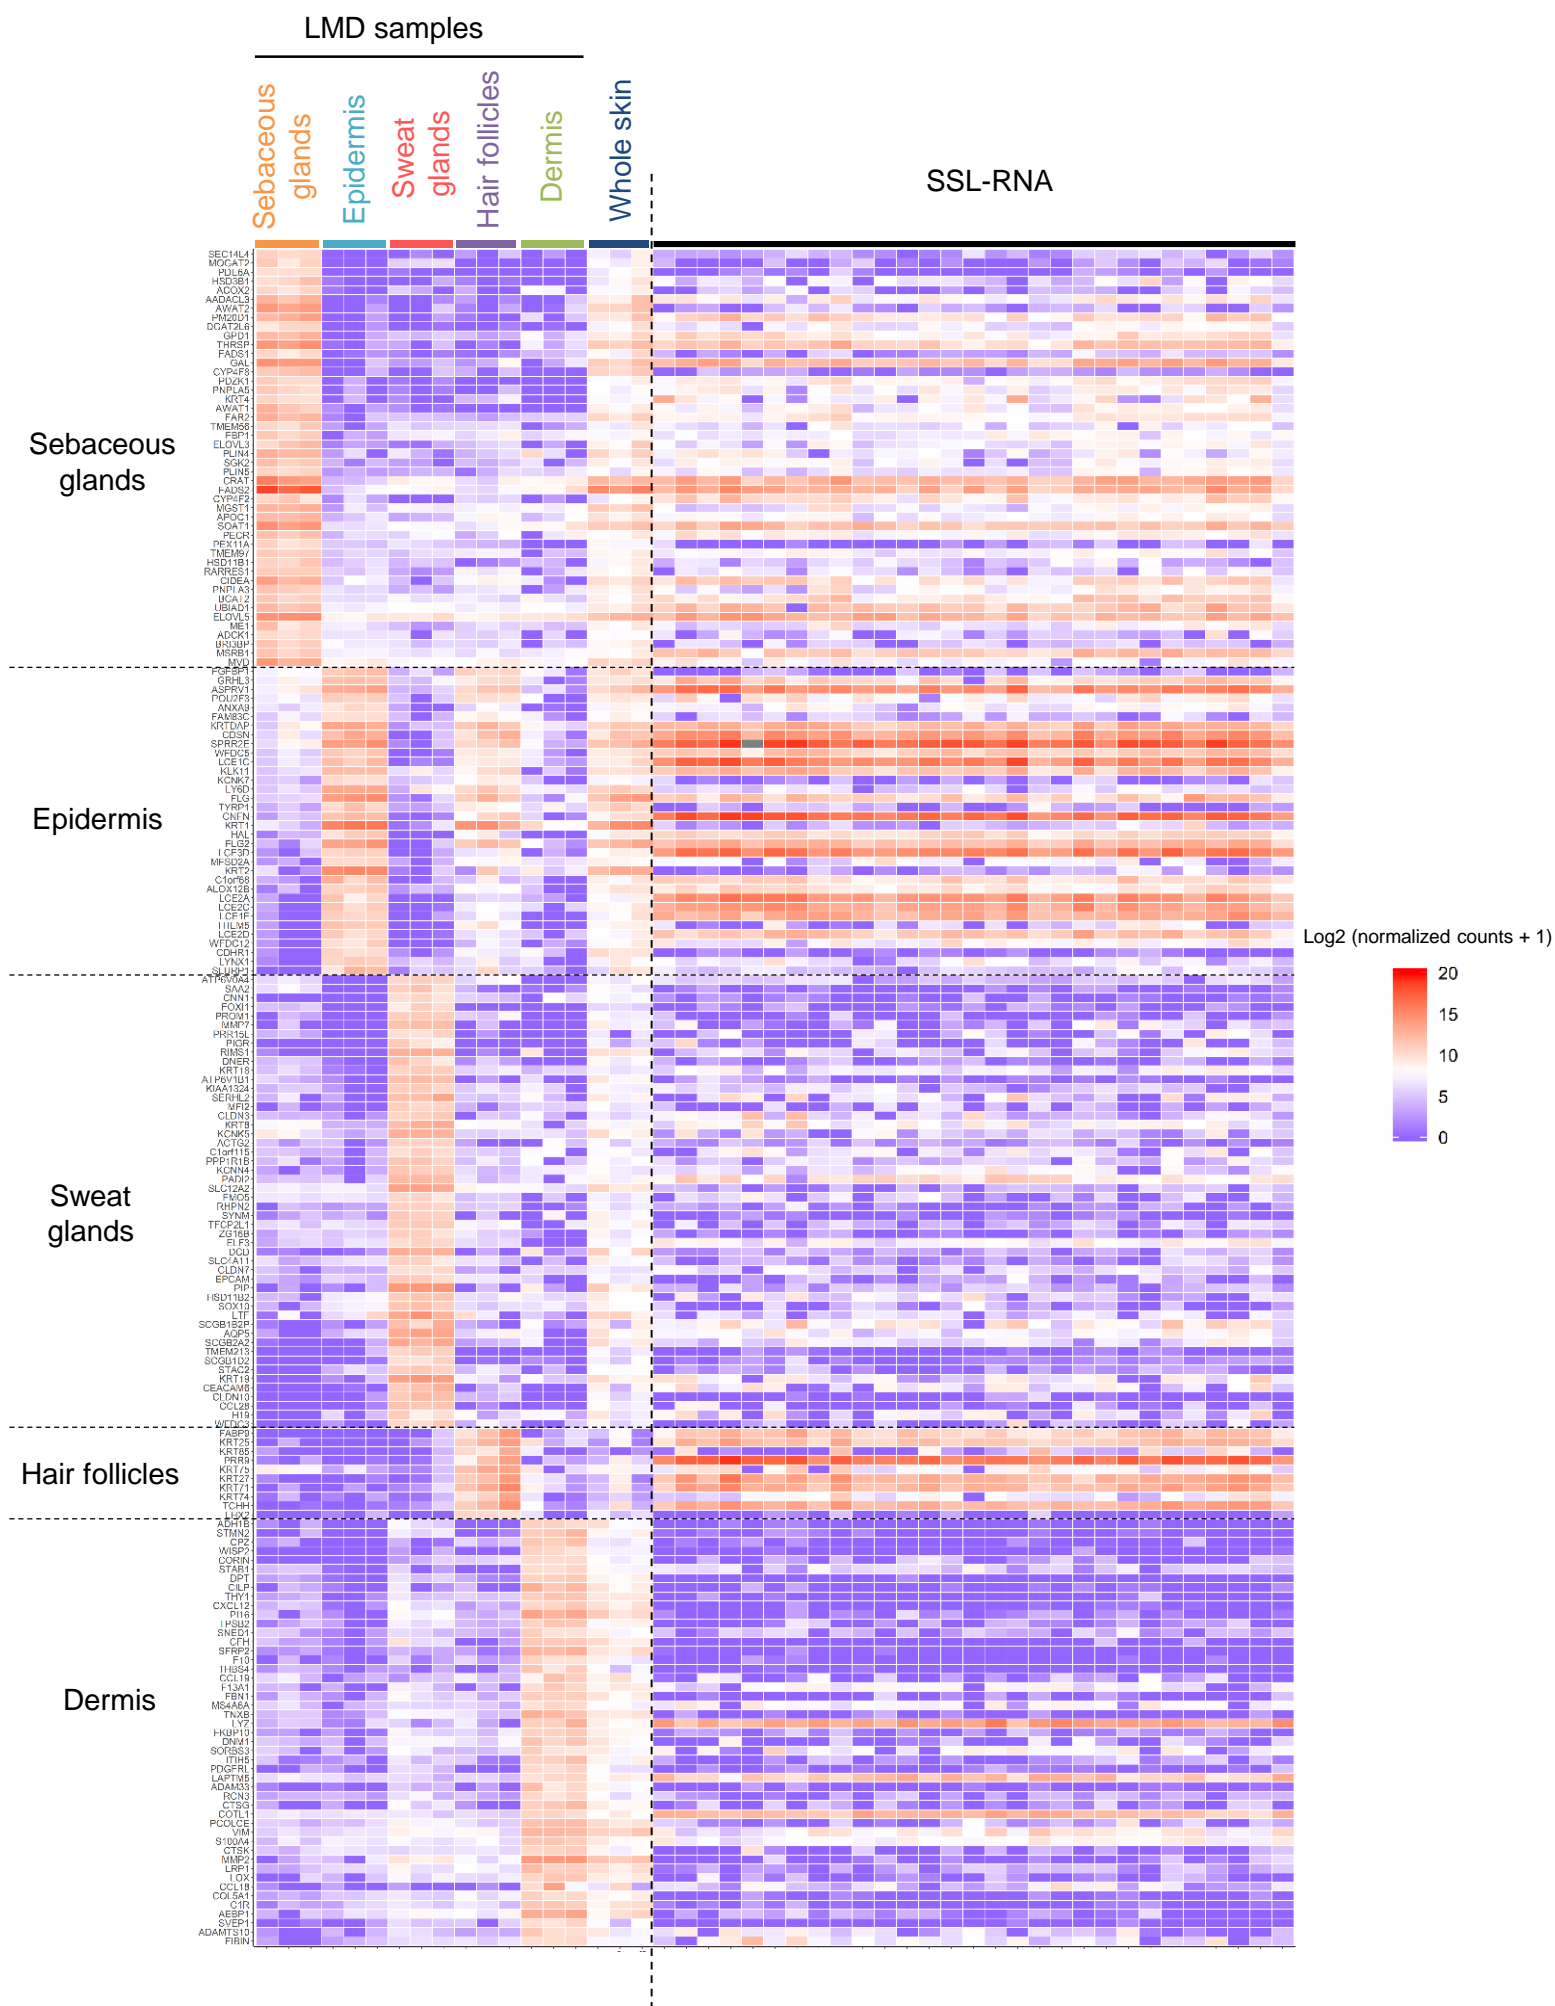

Figure 4. mRNA expression characteristic of different skin regions and its comparison with the expression profile of SSL-RNAs

Heatmap showing the expression profiles for each region (sebaceous glands, epidermis, sweat glands, hair follicles, and dermis) isolated using LMD, whole skin from three healthy male subjects, and SSL-RNAs obtained from 29 healthy male subjects.

Figure 5

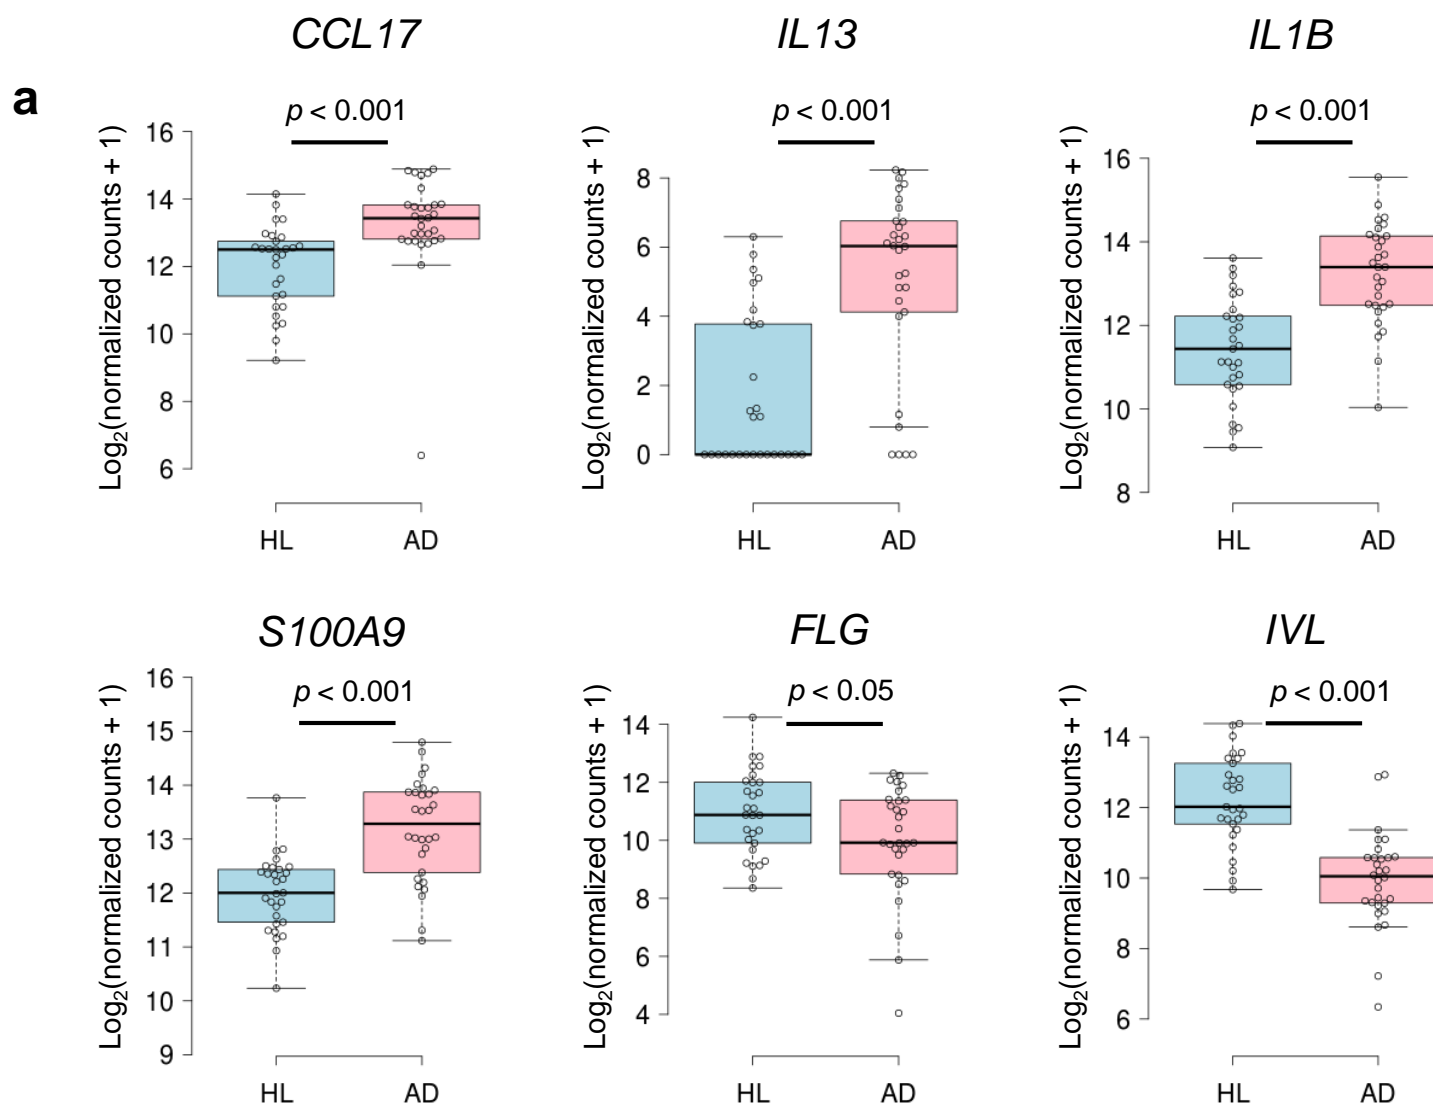

**b** Terminal differentiation-related genes

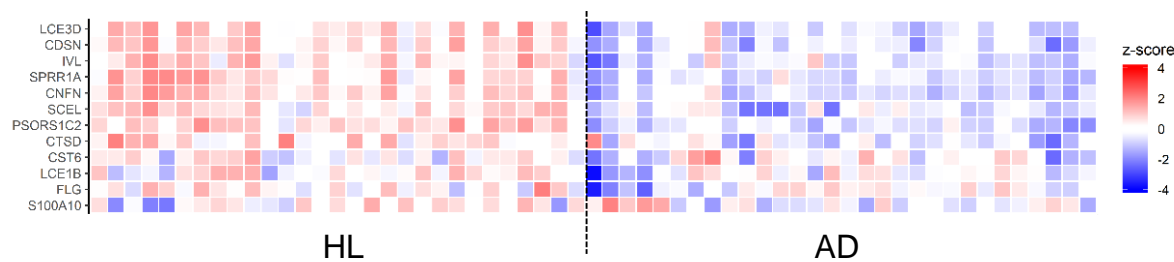

Genes related to immune-mediated inflammation

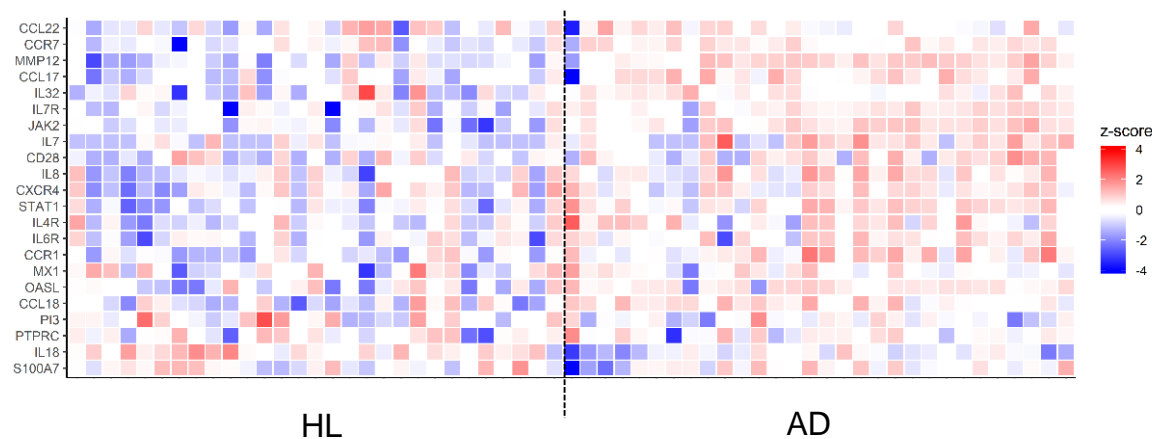

Figure 5. Comparison of AD marker genes in healthy subjects (HL) and patients with AD

**(a)** The differential expression of *CCL17*, *IL13*, *IL1B*, *S100A9*, *FLG*, and *IVL* in HL and AD. Boxes represent mean  $\pm$  interquartile range (IQR), and whiskers represent 1st and 3rd quartile  $1.5 * IQR$ .

Benjamini-Hochberg adjusted  $p$ -values are shown from the likelihood ratio test between HL and AD. HL (n = 29), AD (n = 30). **(b)** Heatmaps using z-transformed  $\log_2$  (normalized counts + 1) in 12 terminal differentiation-related genes (upper) and 22 genes related to immune-mediated inflammation (lower).



## Figure 6

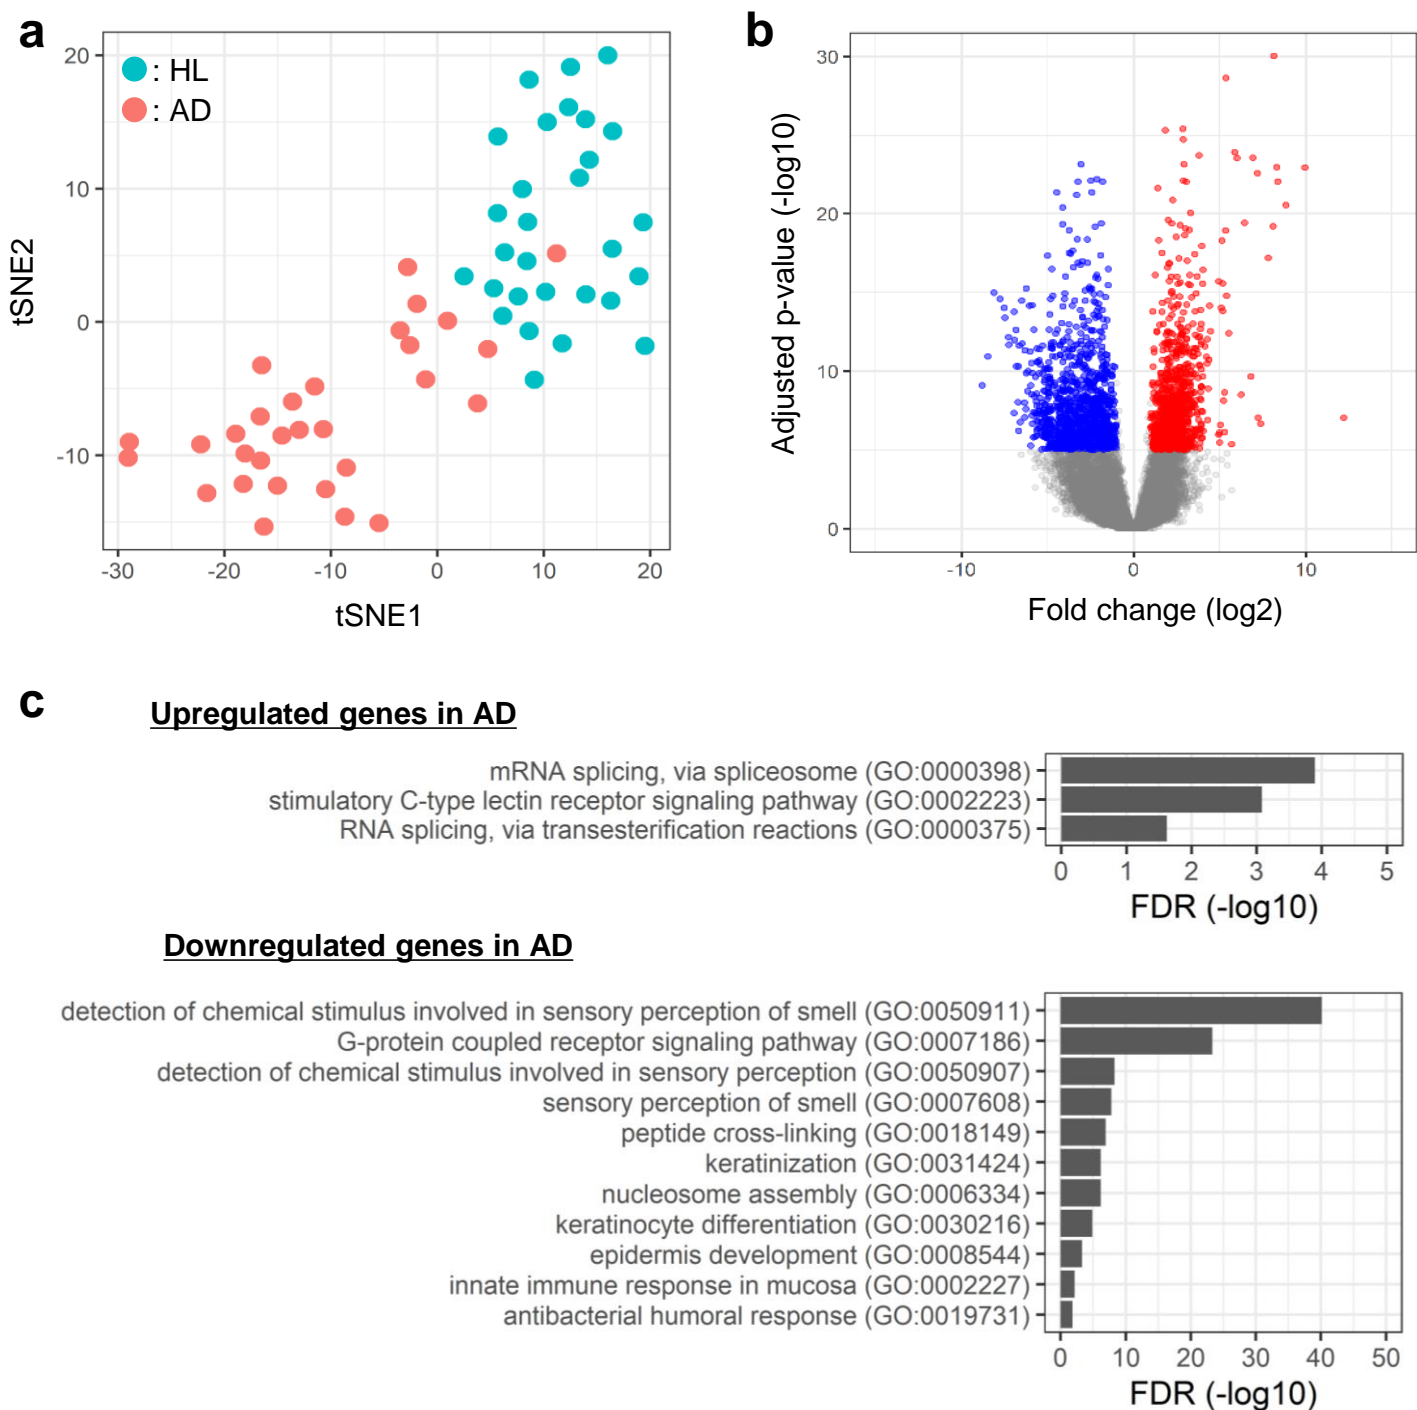

Figure 6. Characterization of SSL-RNAs profiles in healthy subjects (HL) and patients with AD

(a) t-SNE analysis using variance stabilizing transformation (VST) values for all genes (green, HL; red,

AD). (b) Volcano plot of differentially expressed genes (DEGs) (red, upregulated; blue, downregulated)

in patients with AD compared to HL subjects (Benjamini-Hochberg adjusted  $p$ -value  $< 10^{-5}$  and fold

change  $> 2.0$ ). (c) Gene ontology analysis of DEGs. The upper panel shows significant biological process

(BP) of upregulated DEGs and the lower panel shows BP of downregulated DEGs in patients with AD

(FDR  $< 0.05$ ).

## Figure 7

**a**

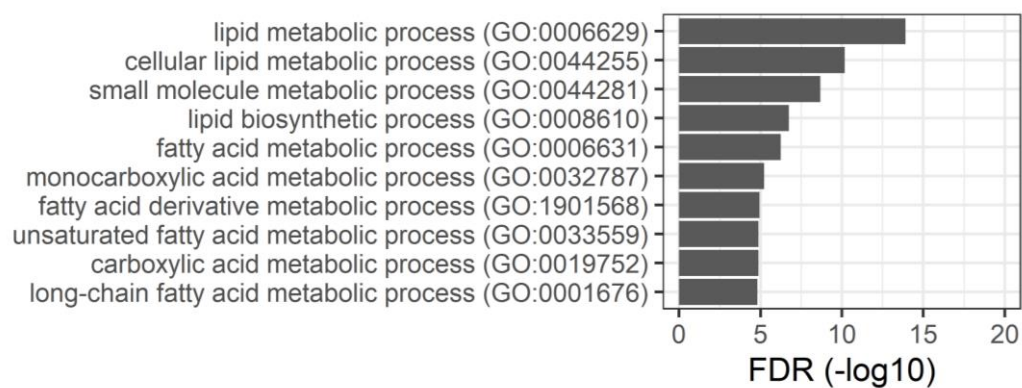

**b**

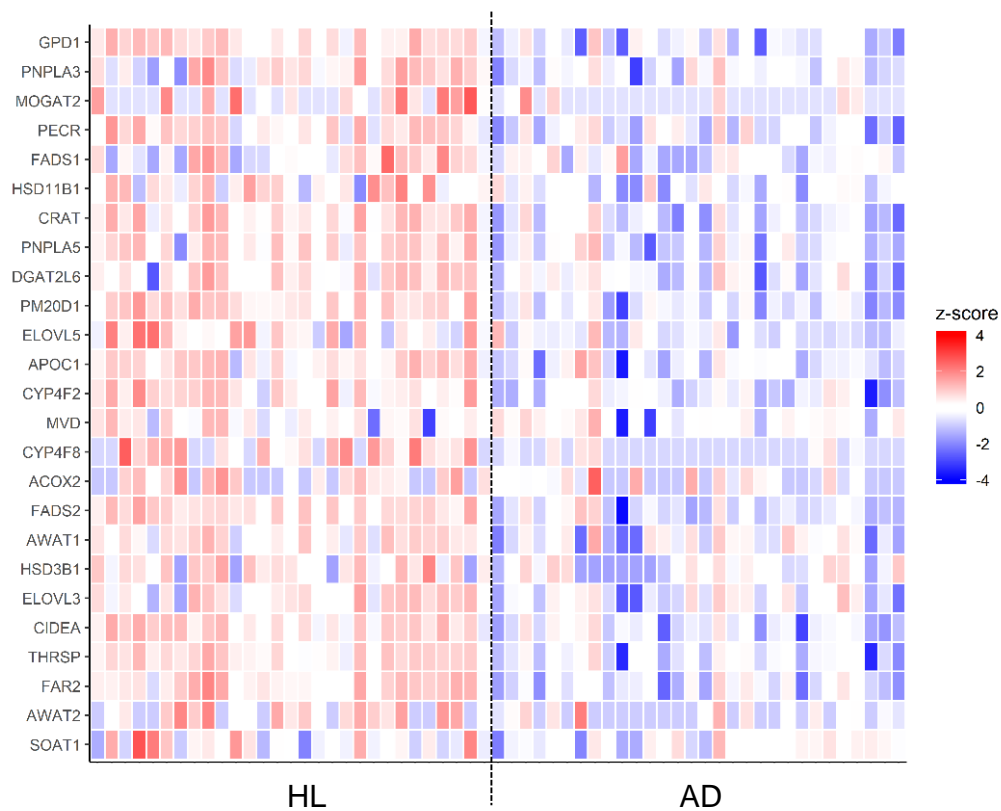

**c**

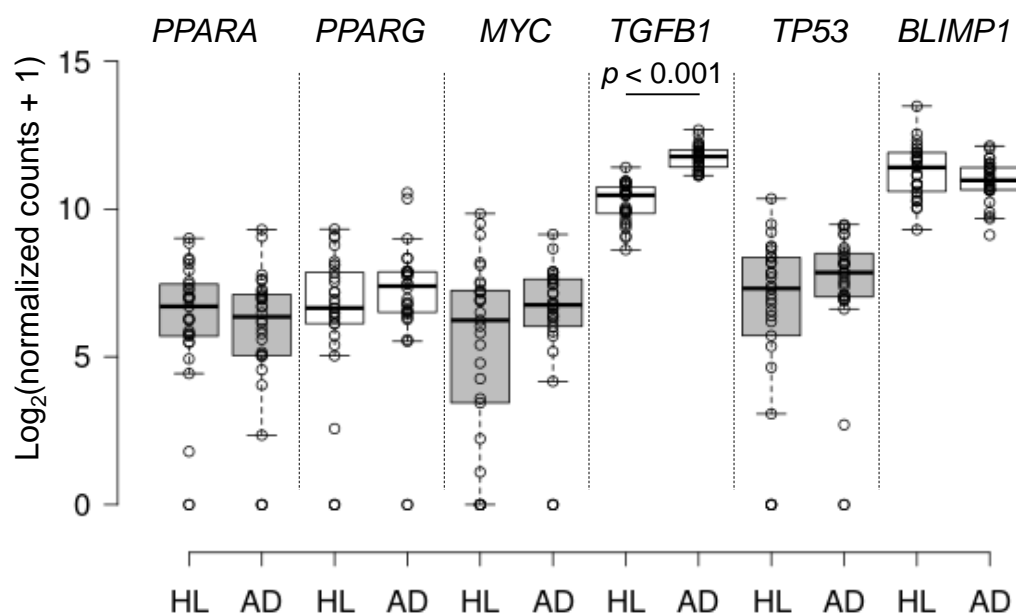

Figure 7. Comparison of SSL-RNAs profile representing highly expressed genes in sebaceous glands in healthy subjects (HL) and patients with AD

**(a)** Gene ontology analysis of 25 genes highly expressed in sebaceous glands (selected in Fig. 4). **(b)** Heatmaps using z-transformed  $\log_2$  (normalized counts + 1) of 25 genes highly expressed in sebaceous glands. **(c)** The differential expression of *PPARA*, *PPARG*, *MYC*, *TGFB1*, *TP53*, and *BLIMP1* in HL and patients with AD. Boxes represent mean  $\pm$  interquartile range (IQR), and whiskers represent 1st and 3rd quartile  $1.5 * IQR$ . Benjamini-Hochberg adjusted *p*-values are shown from the likelihood ratio test between HL and AD. HL (n = 29), patients with AD (n = 30).
